# Supplementary material
Source: publisher figshare collection journal article supplement (https://diabetesjournals.figshare.com/ndownloader/files/29066919)
Supplement: Supplementary file 1 [file 29066919]

## Sheet: Description
Genes differentially expressed between each cell type and all other cells
Columns	Description
pval	p-value from wilcox test of indicated cluster compared to other clusters
avg_logFC	average fold change expressed in natural log
pct.1	percent of cells expressing gene (UMI > 0) in cluster
pct.2	percent of cell expressing gene (UMI > 0) in all other clusters
p_val_adj	Bonferroni corrected p-value
cluster	cluster name
gene	gene name

## Sheet: CD9+ seBC
p_val	avg_logFC	pct.1	pct.2	p_val_adj	cluster	gene
6.61179e-284	0.770242	0.529	0.007	1.24546e-279	Beta subpopulation 2 and 4 (CD9+)	CYR61
2.31499e-208	0.34888	0.379	0.005	4.36074e-204	Beta subpopulation 2 and 4 (CD9+)	SPARC
8.37702e-202	0.76572	0.529	0.015	1.57798e-197	Beta subpopulation 2 and 4 (CD9+)	COL2A1
1.80421e-173	0.357937	0.425	0.01	3.39859e-169	Beta subpopulation 2 and 4 (CD9+)	TGIF1
4.86162e-166	0.399455	0.379	0.008	9.15783e-162	Beta subpopulation 2 and 4 (CD9+)	MDFI
3.43452e-164	1.00495	0.678	0.039	6.46961e-160	Beta subpopulation 2 and 4 (CD9+)	CRABP2
2.66139e-158	0.817771	0.46	0.015	5.01326e-154	Beta subpopulation 2 and 4 (CD9+)	PAX1
2.40955e-154	1.11451	0.54	0.024	4.53887e-150	Beta subpopulation 2 and 4 (CD9+)	RNASE1
1.78533e-151	0.369299	0.333	0.007	3.36302e-147	Beta subpopulation 2 and 4 (CD9+)	EFEMP1
1.06153e-143	0.917191	0.517	0.023	1.99961e-139	Beta subpopulation 2 and 4 (CD9+)	CTGF
2.79264e-143	0.611194	0.494	0.021	5.2605e-139	Beta subpopulation 2 and 4 (CD9+)	ANXA3
2.22401e-139	1.16882	0.759	0.064	4.18936e-135	Beta subpopulation 2 and 4 (CD9+)	ZFP36L1
1.21911e-135	0.548612	0.31	0.007	2.29645e-131	Beta subpopulation 2 and 4 (CD9+)	EDN1
1.45436e-124	0.259553	0.184	0.001	2.73958e-120	Beta subpopulation 2 and 4 (CD9+)	ANKRD1
2.13333e-124	0.97284	0.736	0.068	4.01855e-120	Beta subpopulation 2 and 4 (CD9+)	CLDN6
6.28897e-123	0.282388	0.345	0.011	1.18465e-118	Beta subpopulation 2 and 4 (CD9+)	TEAD2
7.32282e-123	0.252595	0.195	0.002	1.3794e-118	Beta subpopulation 2 and 4 (CD9+)	CCDC80
7.3214e-121	0.422259	0.54	0.032	1.37913e-116	Beta subpopulation 2 and 4 (CD9+)	FSCN1
4.59766e-111	1.59097	0.736	0.078	8.66062e-107	Beta subpopulation 2 and 4 (CD9+)	ANXA2
4.99806e-109	0.784823	0.609	0.05	9.41484e-105	Beta subpopulation 2 and 4 (CD9+)	FBLN1
3.75252e-108	0.266533	0.241	0.005	7.06863e-104	Beta subpopulation 2 and 4 (CD9+)	FZD7
2.49766e-99	0.326946	0.345	0.015	4.70484e-95	Beta subpopulation 2 and 4 (CD9+)	BCAT1
9.62636e-98	0.634777	0.552	0.045	1.81332e-93	Beta subpopulation 2 and 4 (CD9+)	FRMD4A
2.83629e-97	0.539109	0.345	0.015	5.34273e-93	Beta subpopulation 2 and 4 (CD9+)	PTN
4.08667e-96	0.274355	0.184	0.003	7.69806e-92	Beta subpopulation 2 and 4 (CD9+)	VGLL2
3.39595e-95	0.263605	0.161	0.002	6.39695e-91	Beta subpopulation 2 and 4 (CD9+)	SLC34A2
2.1716e-94	0.396072	0.517	0.039	4.09065e-90	Beta subpopulation 2 and 4 (CD9+)	BCL2L12
2.0124e-93	0.730283	0.207	0.004	3.79075e-89	Beta subpopulation 2 and 4 (CD9+)	ATP12A
5.75058e-92	0.551953	0.437	0.028	1.08324e-87	Beta subpopulation 2 and 4 (CD9+)	CENPF
9.66712e-92	0.557897	0.644	0.067	1.821e-87	Beta subpopulation 2 and 4 (CD9+)	FSTL1
8.79804e-89	0.389905	0.414	0.026	1.65729e-84	Beta subpopulation 2 and 4 (CD9+)	LYPD6B
4.43374e-86	0.262257	0.149	0.002	8.35184e-82	Beta subpopulation 2 and 4 (CD9+)	LAMC2
1.87698e-85	0.331342	0.402	0.025	3.53566e-81	Beta subpopulation 2 and 4 (CD9+)	COL4A2
2.08492e-83	0.505534	0.207	0.005	3.92737e-79	Beta subpopulation 2 and 4 (CD9+)	UPK1B
2.36398e-83	0.362235	0.184	0.004	4.45304e-79	Beta subpopulation 2 and 4 (CD9+)	MUC16
2.04554e-80	0.790513	0.437	0.034	3.85318e-76	Beta subpopulation 2 and 4 (CD9+)	C19orf33
4.26192e-80	0.516017	0.494	0.043	8.02819e-76	Beta subpopulation 2 and 4 (CD9+)	TYMS
2.83079e-79	0.776346	0.655	0.086	5.33237e-75	Beta subpopulation 2 and 4 (CD9+)	NR2F2
9.28574e-79	0.276447	0.356	0.021	1.74915e-74	Beta subpopulation 2 and 4 (CD9+)	RPL39L
1.37223e-78	1.09455	0.828	0.151	2.58488e-74	Beta subpopulation 2 and 4 (CD9+)	TPM2
7.24131e-78	0.686465	0.678	0.093	1.36404e-73	Beta subpopulation 2 and 4 (CD9+)	PRTG
1.69473e-77	0.305573	0.287	0.013	3.19235e-73	Beta subpopulation 2 and 4 (CD9+)	SOX9
2.00618e-77	0.406962	0.138	0.002	3.77905e-73	Beta subpopulation 2 and 4 (CD9+)	SERPINB2
1.55164e-76	0.545666	0.517	0.05	2.92283e-72	Beta subpopulation 2 and 4 (CD9+)	CD9
7.63433e-76	0.268694	0.276	0.012	1.43808e-71	Beta subpopulation 2 and 4 (CD9+)	TNNC1
2.33116e-75	0.812852	0.885	0.167	4.3912e-71	Beta subpopulation 2 and 4 (CD9+)	MGST1
7.87099e-73	0.300405	0.126	0.001	1.48266e-68	Beta subpopulation 2 and 4 (CD9+)	CXCL5
3.70608e-72	0.290566	0.368	0.025	6.98115e-68	Beta subpopulation 2 and 4 (CD9+)	CCNB2
2.99927e-71	0.575706	0.184	0.005	5.64973e-67	Beta subpopulation 2 and 4 (CD9+)	CA4
1.93233e-68	0.768884	0.701	0.115	3.63993e-64	Beta subpopulation 2 and 4 (CD9+)	HMGA2
2.55004e-68	0.420487	0.529	0.061	4.80351e-64	Beta subpopulation 2 and 4 (CD9+)	YBX3
3.41837e-65	0.54972	0.644	0.098	6.43919e-61	Beta subpopulation 2 and 4 (CD9+)	FLNA
7.10687e-65	0.850252	0.655	0.106	1.33872e-60	Beta subpopulation 2 and 4 (CD9+)	TMSB15A
6.93887e-64	0.838027	0.437	0.043	1.30707e-59	Beta subpopulation 2 and 4 (CD9+)	CYP1B1
2.53472e-62	0.261365	0.253	0.013	4.77465e-58	Beta subpopulation 2 and 4 (CD9+)	DLGAP5
6.89317e-62	0.387842	0.506	0.06	1.29847e-57	Beta subpopulation 2 and 4 (CD9+)	SLC16A1
1.37441e-60	0.393649	0.184	0.006	2.58898e-56	Beta subpopulation 2 and 4 (CD9+)	FRZB
2.1868e-59	0.693743	0.793	0.178	4.11928e-55	Beta subpopulation 2 and 4 (CD9+)	TSPAN6
5.97567e-59	0.614549	0.241	0.013	1.12564e-54	Beta subpopulation 2 and 4 (CD9+)	UPK2
9.43454e-59	0.74462	0.851	0.211	1.77718e-54	Beta subpopulation 2 and 4 (CD9+)	CNN2
1.12935e-58	0.270679	0.345	0.027	2.12736e-54	Beta subpopulation 2 and 4 (CD9+)	MKI67
1.42544e-58	0.581087	0.46	0.052	2.68511e-54	Beta subpopulation 2 and 4 (CD9+)	SOX2
2.13135e-58	0.284441	0.345	0.028	4.01483e-54	Beta subpopulation 2 and 4 (CD9+)	AURKB
9.85539e-58	0.363579	0.391	0.037	1.85646e-53	Beta subpopulation 2 and 4 (CD9+)	CENPH
1.62581e-57	0.340042	0.402	0.04	3.06254e-53	Beta subpopulation 2 and 4 (CD9+)	SLC1A5
1.62174e-55	0.272426	0.356	0.032	3.05487e-51	Beta subpopulation 2 and 4 (CD9+)	CTSC
3.55977e-55	0.277027	0.322	0.026	6.70555e-51	Beta subpopulation 2 and 4 (CD9+)	CENPU
8.03824e-54	0.988551	1	1	1.51416e-49	Beta subpopulation 2 and 4 (CD9+)	RPS18
8.18934e-54	0.330687	0.333	0.029	1.54263e-49	Beta subpopulation 2 and 4 (CD9+)	ENC1
1.16752e-53	0.537333	0.356	0.034	2.19926e-49	Beta subpopulation 2 and 4 (CD9+)	LGALS3
4.60549e-53	0.452968	0.391	0.04	8.67536e-49	Beta subpopulation 2 and 4 (CD9+)	CCNB1
8.81304e-53	0.912632	1	1	1.66011e-48	Beta subpopulation 2 and 4 (CD9+)	RPL15
2.25684e-52	1.08195	1	1	4.25121e-48	Beta subpopulation 2 and 4 (CD9+)	RPL7
5.31452e-52	1.05897	1	1	1.0011e-47	Beta subpopulation 2 and 4 (CD9+)	RPS19
7.04477e-52	0.272993	0.31	0.026	1.32702e-47	Beta subpopulation 2 and 4 (CD9+)	ORC6
1.23137e-51	0.922148	1	1	2.31953e-47	Beta subpopulation 2 and 4 (CD9+)	RPS17
1.55895e-51	0.814287	1	1	2.9366e-47	Beta subpopulation 2 and 4 (CD9+)	RPL18A
1.58053e-51	0.735841	1	1	2.97725e-47	Beta subpopulation 2 and 4 (CD9+)	RPS14
2.87974e-51	0.855832	1	1	5.42457e-47	Beta subpopulation 2 and 4 (CD9+)	RPL34
3.50561e-51	0.921264	1	1	6.60353e-47	Beta subpopulation 2 and 4 (CD9+)	RPL26
1.06555e-50	0.894646	1	1	2.00717e-46	Beta subpopulation 2 and 4 (CD9+)	RPL10
1.24126e-50	0.46375	0.425	0.05	2.33815e-46	Beta subpopulation 2 and 4 (CD9+)	BIRC5
1.50195e-50	1.08624	1	1	2.82922e-46	Beta subpopulation 2 and 4 (CD9+)	RPS6
1.57972e-50	1.15948	0.989	0.901	2.97573e-46	Beta subpopulation 2 and 4 (CD9+)	EEF1D
2.2151e-50	1.3475	0.885	0.3	4.17258e-46	Beta subpopulation 2 and 4 (CD9+)	IFITM3
4.68987e-50	0.989811	1	0.983	8.83431e-46	Beta subpopulation 2 and 4 (CD9+)	RPL36A
8.71169e-50	0.909008	1	1	1.64102e-45	Beta subpopulation 2 and 4 (CD9+)	RPL10A
1.02785e-49	0.768176	1	1	1.93615e-45	Beta subpopulation 2 and 4 (CD9+)	RPL32
1.43204e-49	1.12543	0.759	0.181	2.69752e-45	Beta subpopulation 2 and 4 (CD9+)	HES1
1.52582e-49	0.776545	0.494	0.072	2.87419e-45	Beta subpopulation 2 and 4 (CD9+)	UBE2C
2.04768e-49	0.865385	1	1	3.85721e-45	Beta subpopulation 2 and 4 (CD9+)	RPL39
2.18132e-49	0.803898	1	0.999	4.10895e-45	Beta subpopulation 2 and 4 (CD9+)	RPL37
5.54041e-49	0.758393	1	1	1.04365e-44	Beta subpopulation 2 and 4 (CD9+)	RPS15A
6.19987e-49	1.58085	0.954	0.592	1.16787e-44	Beta subpopulation 2 and 4 (CD9+)	LDHB
1.37727e-48	1.54958	1	0.967	2.59436e-44	Beta subpopulation 2 and 4 (CD9+)	GSTP1
2.30822e-48	0.535933	0.391	0.045	4.348e-44	Beta subpopulation 2 and 4 (CD9+)	VCAN
2.43782e-48	0.889025	1	1	4.59212e-44	Beta subpopulation 2 and 4 (CD9+)	RPS24
4.34487e-48	0.733442	0.736	0.186	8.18443e-44	Beta subpopulation 2 and 4 (CD9+)	CNN3
8.30427e-48	0.753111	1	1	1.56428e-43	Beta subpopulation 2 and 4 (CD9+)	RPS7
8.41484e-48	0.798985	1	0.999	1.5851e-43	Beta subpopulation 2 and 4 (CD9+)	RPL27
1.22471e-47	0.827689	1	1	2.30699e-43	Beta subpopulation 2 and 4 (CD9+)	RPLP1
3.92676e-47	0.34817	0.333	0.033	7.39684e-43	Beta subpopulation 2 and 4 (CD9+)	TOP2A
7.07599e-47	0.784459	1	1	1.3329e-42	Beta subpopulation 2 and 4 (CD9+)	RPS23
8.70143e-47	0.849424	1	0.998	1.63909e-42	Beta subpopulation 2 and 4 (CD9+)	RPL23
9.03725e-47	0.287724	0.287	0.025	1.70235e-42	Beta subpopulation 2 and 4 (CD9+)	PIM1
1.03137e-46	0.666738	1	1	1.94279e-42	Beta subpopulation 2 and 4 (CD9+)	RPS25
1.39276e-46	0.824204	1	1	2.62355e-42	Beta subpopulation 2 and 4 (CD9+)	EEF1A1
1.54198e-46	0.678802	1	1	2.90463e-42	Beta subpopulation 2 and 4 (CD9+)	RPL35A
1.59309e-46	0.70812	1	1	3.00091e-42	Beta subpopulation 2 and 4 (CD9+)	RPL35
1.61611e-46	0.671578	1	1	3.04427e-42	Beta subpopulation 2 and 4 (CD9+)	RPL11
1.78856e-46	0.45793	0.184	0.009	3.36912e-42	Beta subpopulation 2 and 4 (CD9+)	RSPO3
2.35822e-46	0.688879	1	1	4.44217e-42	Beta subpopulation 2 and 4 (CD9+)	RPL13
2.40785e-46	0.666258	1	1	4.53566e-42	Beta subpopulation 2 and 4 (CD9+)	RPS27A
3.26877e-46	0.648162	1	1	6.15738e-42	Beta subpopulation 2 and 4 (CD9+)	RPLP2
3.30723e-46	0.686369	1	1	6.22982e-42	Beta subpopulation 2 and 4 (CD9+)	RPL29
4.51097e-46	0.774801	1	1	8.49731e-42	Beta subpopulation 2 and 4 (CD9+)	RPS12
8.50068e-46	1.38608	0.977	0.761	1.60127e-41	Beta subpopulation 2 and 4 (CD9+)	HMGA1
8.54779e-46	0.754945	0.632	0.135	1.61015e-41	Beta subpopulation 2 and 4 (CD9+)	LMO4
9.63693e-46	0.574742	1	1	1.81531e-41	Beta subpopulation 2 and 4 (CD9+)	RPL8
2.15321e-45	0.723409	1	1	4.056e-41	Beta subpopulation 2 and 4 (CD9+)	RPS2
2.64906e-45	0.723891	1	0.999	4.99003e-41	Beta subpopulation 2 and 4 (CD9+)	NACA
3.09112e-45	0.766543	1	1	5.82274e-41	Beta subpopulation 2 and 4 (CD9+)	RPS4X
4.99989e-45	0.693049	1	1	9.41829e-41	Beta subpopulation 2 and 4 (CD9+)	RPS5
8.30332e-45	0.906411	1	0.998	1.5641e-40	Beta subpopulation 2 and 4 (CD9+)	RPS21
1.67053e-44	0.270355	0.345	0.037	3.14678e-40	Beta subpopulation 2 and 4 (CD9+)	LMNB1
1.68141e-44	0.587278	1	1	3.16728e-40	Beta subpopulation 2 and 4 (CD9+)	RPS13
1.93936e-44	0.693361	1	1	3.65318e-40	Beta subpopulation 2 and 4 (CD9+)	RPL21
3.85998e-44	0.702081	0.149	0.006	7.27105e-40	Beta subpopulation 2 and 4 (CD9+)	ANXA1
6.66382e-44	0.772482	1	1	1.25526e-39	Beta subpopulation 2 and 4 (CD9+)	RPS3A
8.52293e-44	0.678167	1	1	1.60546e-39	Beta subpopulation 2 and 4 (CD9+)	RPL7A
8.5824e-44	0.794359	1	1	1.61667e-39	Beta subpopulation 2 and 4 (CD9+)	RPL6
9.03323e-44	0.728432	1	1	1.70159e-39	Beta subpopulation 2 and 4 (CD9+)	RPL31
1.34612e-43	0.297134	0.483	0.075	2.53569e-39	Beta subpopulation 2 and 4 (CD9+)	POLE4
1.35263e-43	0.468883	0.483	0.077	2.54795e-39	Beta subpopulation 2 and 4 (CD9+)	CENPW
1.58903e-43	0.761691	1	1	2.99326e-39	Beta subpopulation 2 and 4 (CD9+)	RPS8
1.82962e-43	0.529783	0.517	0.092	3.44645e-39	Beta subpopulation 2 and 4 (CD9+)	CSRP2
2.04888e-43	1.76907	0.368	0.046	3.85948e-39	Beta subpopulation 2 and 4 (CD9+)	SPP1
3.22846e-43	0.584547	1	1	6.08145e-39	Beta subpopulation 2 and 4 (CD9+)	RPL27A
6.13017e-43	0.716758	1	1	1.15474e-38	Beta subpopulation 2 and 4 (CD9+)	RPS3
6.81802e-43	1.17917	1	0.998	1.28431e-38	Beta subpopulation 2 and 4 (CD9+)	TMSB10
1.06503e-42	0.649383	1	1	2.0062e-38	Beta subpopulation 2 and 4 (CD9+)	RPS16
1.89535e-42	1.08942	0.667	0.164	3.57027e-38	Beta subpopulation 2 and 4 (CD9+)	HMGB2
2.43164e-42	0.785732	1	1	4.58049e-38	Beta subpopulation 2 and 4 (CD9+)	RPL5
3.11276e-42	0.256743	0.253	0.021	5.86351e-38	Beta subpopulation 2 and 4 (CD9+)	TPX2
7.05742e-42	0.651866	1	1	1.32941e-37	Beta subpopulation 2 and 4 (CD9+)	RPL12
7.8823e-42	0.649659	1	1	1.48479e-37	Beta subpopulation 2 and 4 (CD9+)	RPL22
8.42763e-42	0.83956	0.793	0.254	1.58751e-37	Beta subpopulation 2 and 4 (CD9+)	TMEM97
1.61786e-41	0.751693	1	1	3.04756e-37	Beta subpopulation 2 and 4 (CD9+)	RPSA
4.63019e-41	0.852285	1	0.987	8.72188e-37	Beta subpopulation 2 and 4 (CD9+)	EEF1B2
4.83351e-41	0.655113	0.736	0.207	9.10488e-37	Beta subpopulation 2 and 4 (CD9+)	LITAF
1.08527e-40	0.598166	1	1	2.04433e-36	Beta subpopulation 2 and 4 (CD9+)	RPL9
2.23572e-40	0.43838	0.184	0.011	4.21142e-36	Beta subpopulation 2 and 4 (CD9+)	FAM3D
9.44238e-40	0.527608	1	1	1.77866e-35	Beta subpopulation 2 and 4 (CD9+)	RPS27
1.50902e-39	0.356338	0.54	0.105	2.84254e-35	Beta subpopulation 2 and 4 (CD9+)	HELLS
2.01221e-39	1.38319	0.989	0.829	3.7904e-35	Beta subpopulation 2 and 4 (CD9+)	TUBB
2.41088e-39	0.635561	1	0.999	4.54137e-35	Beta subpopulation 2 and 4 (CD9+)	RPS20
3.27569e-39	1.16638	1	0.993	6.17042e-35	Beta subpopulation 2 and 4 (CD9+)	HNRNPA1
3.3892e-39	0.511579	1	1	6.38423e-35	Beta subpopulation 2 and 4 (CD9+)	RPL41
5.09895e-39	0.616098	1	1	9.60489e-35	Beta subpopulation 2 and 4 (CD9+)	RPS10
8.36814e-39	0.661165	1	1	1.57631e-34	Beta subpopulation 2 and 4 (CD9+)	GNB2L1
9.0949e-39	0.335738	0.391	0.055	1.71321e-34	Beta subpopulation 2 and 4 (CD9+)	MAD2L1
1.82642e-38	0.81999	0.575	0.127	3.44042e-34	Beta subpopulation 2 and 4 (CD9+)	KIAA0101
2.42592e-38	0.552491	0.575	0.124	4.56971e-34	Beta subpopulation 2 and 4 (CD9+)	MEIS2
2.61629e-38	0.858554	0.989	0.768	4.92831e-34	Beta subpopulation 2 and 4 (CD9+)	PABPC1
4.48943e-38	0.275992	0.264	0.026	8.45673e-34	Beta subpopulation 2 and 4 (CD9+)	CITED4
5.13198e-38	0.657509	0.425	0.07	9.66711e-34	Beta subpopulation 2 and 4 (CD9+)	GYPC
6.29921e-38	0.302379	0.253	0.024	1.18658e-33	Beta subpopulation 2 and 4 (CD9+)	DAB2
1.02194e-37	0.296512	0.414	0.063	1.92502e-33	Beta subpopulation 2 and 4 (CD9+)	RMI2
1.87572e-37	0.348785	0.563	0.12	3.53329e-33	Beta subpopulation 2 and 4 (CD9+)	RBPMS
2.20506e-37	0.668951	1	1	4.15367e-33	Beta subpopulation 2 and 4 (CD9+)	RPLP0
2.57235e-37	0.372372	0.161	0.009	4.84553e-33	Beta subpopulation 2 and 4 (CD9+)	CXCL2
3.59511e-37	0.276544	0.103	0.003	6.77211e-33	Beta subpopulation 2 and 4 (CD9+)	CYP26A1
5.66736e-37	0.407343	0.529	0.108	1.06756e-32	Beta subpopulation 2 and 4 (CD9+)	CCDC34
5.71086e-37	0.917276	1	0.983	1.07575e-32	Beta subpopulation 2 and 4 (CD9+)	NPM1
6.16321e-37	0.540583	1	1	1.16096e-32	Beta subpopulation 2 and 4 (CD9+)	RPL23A
6.50807e-37	2.13855	0.977	0.703	1.22592e-32	Beta subpopulation 2 and 4 (CD9+)	KRT18
1.17173e-36	0.459734	1	1	2.20719e-32	Beta subpopulation 2 and 4 (CD9+)	RPL28
1.61595e-36	0.514897	1	1	3.04396e-32	Beta subpopulation 2 and 4 (CD9+)	RPL36
1.85052e-36	0.455775	0.609	0.147	3.48582e-32	Beta subpopulation 2 and 4 (CD9+)	TPD52L1
2.15914e-36	0.497582	1	1	4.06716e-32	Beta subpopulation 2 and 4 (CD9+)	RPL14
3.61162e-36	1.26396	0.954	0.712	6.80321e-32	Beta subpopulation 2 and 4 (CD9+)	TPM1
3.80485e-36	0.541448	1	1	7.1672e-32	Beta subpopulation 2 and 4 (CD9+)	RPL13A
3.88041e-36	0.319163	0.402	0.062	7.30954e-32	Beta subpopulation 2 and 4 (CD9+)	RND3
6.43251e-36	0.270902	0.149	0.008	1.21169e-31	Beta subpopulation 2 and 4 (CD9+)	TTYH1
9.30189e-36	0.453446	1	1	1.7522e-31	Beta subpopulation 2 and 4 (CD9+)	RPS28
9.80649e-36	0.423566	0.253	0.025	1.84725e-31	Beta subpopulation 2 and 4 (CD9+)	LECT1
1.23049e-35	0.933779	0.989	0.755	2.31788e-31	Beta subpopulation 2 and 4 (CD9+)	PRDX1
1.48166e-35	0.463607	1	1	2.79099e-31	Beta subpopulation 2 and 4 (CD9+)	RPL18
1.49834e-35	1.42918	1	0.979	2.82242e-31	Beta subpopulation 2 and 4 (CD9+)	TMSB4X
1.85792e-35	0.738188	1	0.998	3.49977e-31	Beta subpopulation 2 and 4 (CD9+)	RPL4
1.8638e-35	0.282681	0.138	0.007	3.51084e-31	Beta subpopulation 2 and 4 (CD9+)	TNNT3
2.21098e-35	0.846001	0.885	0.416	4.16482e-31	Beta subpopulation 2 and 4 (CD9+)	TPM4
2.95621e-35	0.363664	0.471	0.089	5.56861e-31	Beta subpopulation 2 and 4 (CD9+)	WEE1
5.53245e-35	0.42985	1	1	1.04215e-30	Beta subpopulation 2 and 4 (CD9+)	RPS15
5.78402e-35	0.687868	0.931	0.475	1.08954e-30	Beta subpopulation 2 and 4 (CD9+)	IMPDH2
7.42994e-35	0.254491	0.276	0.03	1.39958e-30	Beta subpopulation 2 and 4 (CD9+)	NUSAP1
1.95768e-34	0.31649	0.529	0.113	3.68769e-30	Beta subpopulation 2 and 4 (CD9+)	SVIL
2.68186e-34	0.317413	0.402	0.066	5.05183e-30	Beta subpopulation 2 and 4 (CD9+)	GINS2
3.35503e-34	0.29526	0.391	0.061	6.31986e-30	Beta subpopulation 2 and 4 (CD9+)	ZWINT
6.15028e-34	0.46925	1	1	1.15853e-29	Beta subpopulation 2 and 4 (CD9+)	RPL30
7.05958e-34	0.479439	1	1	1.32981e-29	Beta subpopulation 2 and 4 (CD9+)	TPT1
1.16113e-33	0.261783	0.368	0.057	2.18723e-29	Beta subpopulation 2 and 4 (CD9+)	MEX3A
1.5214e-33	0.707109	1	0.974	2.86586e-29	Beta subpopulation 2 and 4 (CD9+)	ZFAS1
2.48374e-33	0.65555	0.184	0.014	4.67862e-29	Beta subpopulation 2 and 4 (CD9+)	CXCL3
3.60887e-33	0.314588	0.448	0.086	6.79803e-29	Beta subpopulation 2 and 4 (CD9+)	MCM3
6.26724e-33	0.400391	1	1	1.18056e-28	Beta subpopulation 2 and 4 (CD9+)	RPS9
6.37075e-33	0.63121	1	0.958	1.20006e-28	Beta subpopulation 2 and 4 (CD9+)	RPL17
6.61849e-33	0.379963	1	1	1.24672e-28	Beta subpopulation 2 and 4 (CD9+)	RPL19
1.33576e-32	0.448966	0.356	0.056	2.51616e-28	Beta subpopulation 2 and 4 (CD9+)	SDC1
1.39121e-32	0.724838	0.908	0.435	2.62062e-28	Beta subpopulation 2 and 4 (CD9+)	RCN2
1.41409e-32	1.22714	0.23	0.023	2.66372e-28	Beta subpopulation 2 and 4 (CD9+)	S100P
1.61822e-32	0.57506	1	0.991	3.04824e-28	Beta subpopulation 2 and 4 (CD9+)	BTF3
1.70013e-32	0.564967	0.241	0.025	3.20253e-28	Beta subpopulation 2 and 4 (CD9+)	SNCG
2.0703e-32	0.407271	0.264	0.031	3.89983e-28	Beta subpopulation 2 and 4 (CD9+)	SLC4A4
2.19148e-32	0.550864	0.724	0.238	4.1281e-28	Beta subpopulation 2 and 4 (CD9+)	C19orf48
3.29087e-32	0.397071	0.575	0.146	6.19902e-28	Beta subpopulation 2 and 4 (CD9+)	CMTM7
4.06749e-32	0.830419	1	0.924	7.66192e-28	Beta subpopulation 2 and 4 (CD9+)	NAP1L1
4.45496e-32	0.385145	0.115	0.005	8.39181e-28	Beta subpopulation 2 and 4 (CD9+)	TCN1
9.18806e-32	0.513783	0.402	0.073	1.73076e-27	Beta subpopulation 2 and 4 (CD9+)	FGFBP3
1.38705e-31	0.952726	1	0.999	2.61278e-27	Beta subpopulation 2 and 4 (CD9+)	PTMA
1.5461e-31	0.318751	0.425	0.079	2.91239e-27	Beta subpopulation 2 and 4 (CD9+)	GSN
1.97245e-31	0.73566	0.747	0.303	3.71551e-27	Beta subpopulation 2 and 4 (CD9+)	CENPV
2.3407e-31	0.97808	0.92	0.441	4.40917e-27	Beta subpopulation 2 and 4 (CD9+)	SOX4
2.85246e-31	1.42205	0.908	0.546	5.37318e-27	Beta subpopulation 2 and 4 (CD9+)	MYL9
4.61655e-31	0.421619	0.414	0.076	8.6962e-27	Beta subpopulation 2 and 4 (CD9+)	PSAT1
4.69815e-31	0.322163	0.115	0.005	8.84991e-27	Beta subpopulation 2 and 4 (CD9+)	CYP2W1
5.72821e-31	0.420437	1	1	1.07902e-26	Beta subpopulation 2 and 4 (CD9+)	RPL37A
5.92621e-31	1.48416	0.368	0.063	1.11632e-26	Beta subpopulation 2 and 4 (CD9+)	S100A14
7.7819e-31	0.874964	0.977	0.912	1.46588e-26	Beta subpopulation 2 and 4 (CD9+)	MARCKSL1
8.58461e-31	0.453247	1	1	1.61708e-26	Beta subpopulation 2 and 4 (CD9+)	RPL38
1.33138e-30	0.62584	1	0.96	2.50792e-26	Beta subpopulation 2 and 4 (CD9+)	SLC25A3
1.38184e-30	0.278082	0.23	0.024	2.60296e-26	Beta subpopulation 2 and 4 (CD9+)	CDC20
1.40036e-30	0.350232	0.437	0.087	2.63786e-26	Beta subpopulation 2 and 4 (CD9+)	NUDT1
1.73247e-30	0.655534	1	0.973	3.26345e-26	Beta subpopulation 2 and 4 (CD9+)	HMGN1
2.07077e-30	0.568303	0.299	0.042	3.90071e-26	Beta subpopulation 2 and 4 (CD9+)	IGFBP7
2.21013e-30	0.695159	1	0.945	4.16322e-26	Beta subpopulation 2 and 4 (CD9+)	NDUFA4
2.33613e-30	0.711484	1	0.967	4.40056e-26	Beta subpopulation 2 and 4 (CD9+)	YBX1
4.7855e-30	0.257285	0.287	0.038	9.01444e-26	Beta subpopulation 2 and 4 (CD9+)	LAD1
6.69152e-30	0.678687	0.92	0.509	1.26048e-25	Beta subpopulation 2 and 4 (CD9+)	APEX1
1.97688e-29	0.797694	0.759	0.305	3.72386e-25	Beta subpopulation 2 and 4 (CD9+)	PHGDH
2.6931e-29	0.695317	0.207	0.021	5.073e-25	Beta subpopulation 2 and 4 (CD9+)	TM4SF1
2.97525e-29	0.357679	0.667	0.202	5.60448e-25	Beta subpopulation 2 and 4 (CD9+)	BZW2
7.06669e-29	0.645823	1	0.969	1.33115e-24	Beta subpopulation 2 and 4 (CD9+)	RPS4Y1
8.11394e-29	0.381423	1	1	1.52842e-24	Beta subpopulation 2 and 4 (CD9+)	RPL24
8.93435e-29	0.766618	0.552	0.154	1.68296e-24	Beta subpopulation 2 and 4 (CD9+)	ARHGAP29
4.95982e-28	0.652889	1	0.999	9.34281e-24	Beta subpopulation 2 and 4 (CD9+)	ACTB
9.45501e-28	0.817036	0.644	0.212	1.78104e-23	Beta subpopulation 2 and 4 (CD9+)	GMNN
2.55506e-27	1.62147	0.966	0.868	4.81297e-23	Beta subpopulation 2 and 4 (CD9+)	KRT8
2.64588e-27	1.09786	0.885	0.438	4.98404e-23	Beta subpopulation 2 and 4 (CD9+)	ID3
3.40997e-27	0.550739	1	1	6.42337e-23	Beta subpopulation 2 and 4 (CD9+)	GAPDH
3.79273e-27	0.730856	0.989	0.857	7.14436e-23	Beta subpopulation 2 and 4 (CD9+)	SRSF3
3.88523e-27	0.594704	0.839	0.447	7.31861e-23	Beta subpopulation 2 and 4 (CD9+)	CBX3
5.93577e-27	0.522033	0.253	0.034	1.11812e-22	Beta subpopulation 2 and 4 (CD9+)	CDA
6.80853e-27	0.401956	1	1	1.28252e-22	Beta subpopulation 2 and 4 (CD9+)	RPS29
7.3035e-27	0.686895	0.54	0.154	1.37576e-22	Beta subpopulation 2 and 4 (CD9+)	PTTG1
1.08082e-26	0.324803	0.184	0.018	2.03595e-22	Beta subpopulation 2 and 4 (CD9+)	RHOV
1.34699e-26	1.45616	0.184	0.018	2.53733e-22	Beta subpopulation 2 and 4 (CD9+)	MSMB
1.60938e-26	0.576956	0.977	0.928	3.0316e-22	Beta subpopulation 2 and 4 (CD9+)	SNRPE
1.89751e-26	0.633748	0.989	0.819	3.57434e-22	Beta subpopulation 2 and 4 (CD9+)	SET
1.95997e-26	0.5261	0.471	0.119	3.692e-22	Beta subpopulation 2 and 4 (CD9+)	KLF5
2.58175e-26	0.595624	0.08	0.003	4.86324e-22	Beta subpopulation 2 and 4 (CD9+)	AREG
2.72941e-26	0.326481	0.437	0.099	5.1414e-22	Beta subpopulation 2 and 4 (CD9+)	PLTP
4.95688e-26	0.549671	1	0.998	9.33727e-22	Beta subpopulation 2 and 4 (CD9+)	PPIA
1.77113e-25	0.652677	0.989	0.803	3.33627e-21	Beta subpopulation 2 and 4 (CD9+)	PRDX6
3.19138e-25	0.339872	0.356	0.07	6.01159e-21	Beta subpopulation 2 and 4 (CD9+)	SPRY1
3.774e-25	0.920229	0.908	0.566	7.10908e-21	Beta subpopulation 2 and 4 (CD9+)	CALD1
5.85668e-25	0.610353	1	0.971	1.10322e-20	Beta subpopulation 2 and 4 (CD9+)	HSP90AB1
1.45955e-24	0.27608	0.322	0.057	2.74936e-20	Beta subpopulation 2 and 4 (CD9+)	IFITM2
1.79091e-24	0.576071	0.954	0.807	3.37354e-20	Beta subpopulation 2 and 4 (CD9+)	SERBP1
2.1791e-24	0.260552	0.391	0.084	4.10477e-20	Beta subpopulation 2 and 4 (CD9+)	TCF4
6.64703e-24	0.686568	0.931	0.743	1.2521e-19	Beta subpopulation 2 and 4 (CD9+)	NCL
7.50705e-24	1.27902	0.931	0.702	1.4141e-19	Beta subpopulation 2 and 4 (CD9+)	KRT19
7.91356e-24	0.503843	0.989	0.902	1.49068e-19	Beta subpopulation 2 and 4 (CD9+)	EIF3F
1.07484e-23	0.529022	0.46	0.121	2.02468e-19	Beta subpopulation 2 and 4 (CD9+)	CTSH
1.25216e-23	0.558108	0.805	0.403	2.35869e-19	Beta subpopulation 2 and 4 (CD9+)	CBX1
1.36155e-23	1.00034	0.92	0.577	2.56476e-19	Beta subpopulation 2 and 4 (CD9+)	ID1
1.64112e-23	0.426372	0.621	0.211	3.09139e-19	Beta subpopulation 2 and 4 (CD9+)	CXADR
2.92353e-23	0.313733	0.506	0.142	5.50705e-19	Beta subpopulation 2 and 4 (CD9+)	SMC4
1.0383e-22	0.307212	0.609	0.203	1.95585e-18	Beta subpopulation 2 and 4 (CD9+)	CMSS1
1.20062e-22	0.572901	0.966	0.697	2.26161e-18	Beta subpopulation 2 and 4 (CD9+)	LSM5
1.475e-22	0.688582	0.908	0.623	2.77845e-18	Beta subpopulation 2 and 4 (CD9+)	TKT
1.60585e-22	0.581313	0.816	0.453	3.02495e-18	Beta subpopulation 2 and 4 (CD9+)	HNRNPM
2.98851e-22	0.306304	0.575	0.185	5.62945e-18	Beta subpopulation 2 and 4 (CD9+)	PAICS
3.25832e-22	0.490807	0.828	0.431	6.1377e-18	Beta subpopulation 2 and 4 (CD9+)	DDAH2
5.73239e-22	0.680513	0.966	0.829	1.07981e-17	Beta subpopulation 2 and 4 (CD9+)	HNRNPDL
5.88531e-22	0.26133	0.494	0.137	1.10862e-17	Beta subpopulation 2 and 4 (CD9+)	ALKBH2
5.96201e-22	0.60853	0.954	0.786	1.12306e-17	Beta subpopulation 2 and 4 (CD9+)	HSPD1
6.76309e-22	0.669567	0.161	0.017	1.27396e-17	Beta subpopulation 2 and 4 (CD9+)	CRABP1
1.04551e-21	0.3492	0.299	0.056	1.96943e-17	Beta subpopulation 2 and 4 (CD9+)	HLA-DRB1
1.11419e-21	0.848535	0.759	0.394	2.0988e-17	Beta subpopulation 2 and 4 (CD9+)	CCND1
1.78767e-21	0.531612	1	0.876	3.36743e-17	Beta subpopulation 2 and 4 (CD9+)	EIF3L
1.84046e-21	0.472628	0.575	0.203	3.46687e-17	Beta subpopulation 2 and 4 (CD9+)	PRSS8
2.24813e-21	0.405253	0.172	0.02	4.23481e-17	Beta subpopulation 2 and 4 (CD9+)	TAC3
2.67217e-21	0.268744	0.425	0.111	5.03356e-17	Beta subpopulation 2 and 4 (CD9+)	RAI14
3.01269e-21	0.533555	0.954	0.706	5.675e-17	Beta subpopulation 2 and 4 (CD9+)	EIF2S2
5.02402e-21	0.345816	0.586	0.198	9.46375e-17	Beta subpopulation 2 and 4 (CD9+)	SERPINH1
5.95075e-21	0.548117	1	0.935	1.12094e-16	Beta subpopulation 2 and 4 (CD9+)	EIF3E
7.7931e-21	0.508901	0.828	0.51	1.46799e-16	Beta subpopulation 2 and 4 (CD9+)	CLNS1A
8.33914e-21	0.538967	0.609	0.241	1.57084e-16	Beta subpopulation 2 and 4 (CD9+)	PSIP1
3.70935e-20	0.493114	0.966	0.784	6.9873e-16	Beta subpopulation 2 and 4 (CD9+)	HNRNPA0
3.86073e-20	0.358571	0.632	0.246	7.27246e-16	Beta subpopulation 2 and 4 (CD9+)	DTYMK
5.57273e-20	0.311284	0.54	0.178	1.04973e-15	Beta subpopulation 2 and 4 (CD9+)	SLC38A1
6.71587e-20	0.55423	0.667	0.29	1.26507e-15	Beta subpopulation 2 and 4 (CD9+)	CKS2
7.24743e-20	0.880774	0.954	0.955	1.3652e-15	Beta subpopulation 2 and 4 (CD9+)	HMGB1
7.5966e-20	0.407267	0.448	0.13	1.43097e-15	Beta subpopulation 2 and 4 (CD9+)	TNFRSF12A
8.79112e-20	0.38346	1	0.998	1.65598e-15	Beta subpopulation 2 and 4 (CD9+)	SLC25A6
8.94572e-20	0.77781	0.31	0.068	1.68511e-15	Beta subpopulation 2 and 4 (CD9+)	TAGLN
1.80604e-19	0.327	0.575	0.205	3.40204e-15	Beta subpopulation 2 and 4 (CD9+)	ATIC
2.19567e-19	0.275369	0.46	0.136	4.13598e-15	Beta subpopulation 2 and 4 (CD9+)	CSE1L
2.33263e-19	0.311329	0.379	0.096	4.39398e-15	Beta subpopulation 2 and 4 (CD9+)	CDKN3
2.60379e-19	0.254247	0.391	0.099	4.90476e-15	Beta subpopulation 2 and 4 (CD9+)	RNASEH2A
3.0514e-19	0.794326	0.805	0.513	5.74792e-15	Beta subpopulation 2 and 4 (CD9+)	CKS1B
3.29695e-19	0.681807	0.805	0.544	6.21047e-15	Beta subpopulation 2 and 4 (CD9+)	DEK
3.82866e-19	0.323077	0.103	0.008	7.21205e-15	Beta subpopulation 2 and 4 (CD9+)	CLIC3
5.14008e-19	0.445452	0.529	0.179	9.68236e-15	Beta subpopulation 2 and 4 (CD9+)	NFKBIA
5.43792e-19	0.256189	0.517	0.167	1.02434e-14	Beta subpopulation 2 and 4 (CD9+)	IGF2BP3
6.27366e-19	0.543898	0.793	0.43	1.18177e-14	Beta subpopulation 2 and 4 (CD9+)	PDLIM7
7.8717e-19	0.437279	0.276	0.054	1.48279e-14	Beta subpopulation 2 and 4 (CD9+)	KRT7
1.02329e-18	0.411954	0.69	0.308	1.92757e-14	Beta subpopulation 2 and 4 (CD9+)	SSRP1
1.17265e-18	1.2566	0.92	0.86	2.20892e-14	Beta subpopulation 2 and 4 (CD9+)	TUBA1B
1.4042e-18	0.451116	0.885	0.618	2.64509e-14	Beta subpopulation 2 and 4 (CD9+)	FBL
1.46162e-18	0.666082	0.897	0.778	2.75324e-14	Beta subpopulation 2 and 4 (CD9+)	RANBP1
2.0091e-18	0.256915	1	1	3.78454e-14	Beta subpopulation 2 and 4 (CD9+)	UBA52
2.53717e-18	0.34886	0.724	0.338	4.77926e-14	Beta subpopulation 2 and 4 (CD9+)	EIF2S3
2.9449e-18	0.356658	0.713	0.319	5.5473e-14	Beta subpopulation 2 and 4 (CD9+)	SAE1
3.11009e-18	0.358106	0.621	0.251	5.85847e-14	Beta subpopulation 2 and 4 (CD9+)	SMARCC1
4.12725e-18	0.446684	0.885	0.565	7.7745e-14	Beta subpopulation 2 and 4 (CD9+)	ILF2
4.40435e-18	0.492967	0.138	0.015	8.29648e-14	Beta subpopulation 2 and 4 (CD9+)	ACTA2
5.9458e-18	0.77172	0.264	0.055	1.12001e-13	Beta subpopulation 2 and 4 (CD9+)	SPINK5
5.96362e-18	0.475736	0.713	0.343	1.12337e-13	Beta subpopulation 2 and 4 (CD9+)	XRN2
8.67487e-18	0.349691	0.506	0.175	1.63408e-13	Beta subpopulation 2 and 4 (CD9+)	ACAT2
9.06953e-18	1.16967	0.678	0.337	1.70843e-13	Beta subpopulation 2 and 4 (CD9+)	VIM
1.12904e-17	0.440743	0.862	0.487	2.12677e-13	Beta subpopulation 2 and 4 (CD9+)	CCNG1
1.27076e-17	0.347815	0.46	0.15	2.39373e-13	Beta subpopulation 2 and 4 (CD9+)	MCM7
1.66943e-17	0.606391	0.736	0.446	3.1447e-13	Beta subpopulation 2 and 4 (CD9+)	NASP
2.11971e-17	0.821558	0.851	0.607	3.9929e-13	Beta subpopulation 2 and 4 (CD9+)	FABP5
3.46229e-17	0.303403	0.506	0.169	6.52192e-13	Beta subpopulation 2 and 4 (CD9+)	TMPO
3.50366e-17	0.491947	0.115	0.011	6.59985e-13	Beta subpopulation 2 and 4 (CD9+)	ACTC1
6.06778e-17	0.809356	0.989	0.937	1.14299e-12	Beta subpopulation 2 and 4 (CD9+)	STMN1
6.34689e-17	0.673034	0.115	0.011	1.19556e-12	Beta subpopulation 2 and 4 (CD9+)	KRT4
6.42502e-17	0.43229	0.966	0.801	1.21028e-12	Beta subpopulation 2 and 4 (CD9+)	ANP32B
6.6081e-17	0.468113	0.874	0.601	1.24477e-12	Beta subpopulation 2 and 4 (CD9+)	MRPL11
7.80201e-17	0.455186	0.77	0.458	1.46967e-12	Beta subpopulation 2 and 4 (CD9+)	HDAC2
1.21068e-16	0.455663	0.966	0.816	2.28056e-12	Beta subpopulation 2 and 4 (CD9+)	RBM3
1.22653e-16	0.331987	0.483	0.167	2.31042e-12	Beta subpopulation 2 and 4 (CD9+)	CRNDE
1.73577e-16	0.505763	0.828	0.534	3.26967e-12	Beta subpopulation 2 and 4 (CD9+)	EIF3M
1.8939e-16	0.414123	0.437	0.141	3.56753e-12	Beta subpopulation 2 and 4 (CD9+)	PCOLCE
2.19785e-16	0.420211	0.655	0.295	4.1401e-12	Beta subpopulation 2 and 4 (CD9+)	SHMT2
2.49623e-16	0.356012	0.851	0.458	4.70215e-12	Beta subpopulation 2 and 4 (CD9+)	HNRNPH1
2.4998e-16	0.580064	0.805	0.473	4.70888e-12	Beta subpopulation 2 and 4 (CD9+)	MEST
3.22304e-16	0.64357	0.782	0.436	6.07123e-12	Beta subpopulation 2 and 4 (CD9+)	ODC1
3.443e-16	0.376814	1	0.997	6.48558e-12	Beta subpopulation 2 and 4 (CD9+)	EEF2
3.83415e-16	0.392535	0.989	0.822	7.22238e-12	Beta subpopulation 2 and 4 (CD9+)	EIF3H
4.0071e-16	0.522802	0.931	0.717	7.54818e-12	Beta subpopulation 2 and 4 (CD9+)	HNRNPA3
4.12825e-16	0.392389	0.897	0.599	7.77638e-12	Beta subpopulation 2 and 4 (CD9+)	CCNB1IP1
4.42557e-16	0.395917	0.667	0.326	8.33645e-12	Beta subpopulation 2 and 4 (CD9+)	KPNA2
4.43904e-16	0.670347	0.103	0.01	8.36181e-12	Beta subpopulation 2 and 4 (CD9+)	ITLN1
4.6166e-16	0.556896	0.989	0.789	8.69628e-12	Beta subpopulation 2 and 4 (CD9+)	RPL22L1
5.4032e-16	0.268368	0.483	0.173	1.0178e-11	Beta subpopulation 2 and 4 (CD9+)	GBAS
5.65534e-16	0.498776	1	1	1.0653e-11	Beta subpopulation 2 and 4 (CD9+)	FTH1
5.72292e-16	0.373593	0.517	0.191	1.07803e-11	Beta subpopulation 2 and 4 (CD9+)	SOX11
7.0837e-16	0.416701	0.736	0.424	1.33436e-11	Beta subpopulation 2 and 4 (CD9+)	TPGS2
7.39716e-16	0.489668	0.069	0.004	1.3934e-11	Beta subpopulation 2 and 4 (CD9+)	TSPAN8
9.93603e-16	0.333521	0.713	0.369	1.87165e-11	Beta subpopulation 2 and 4 (CD9+)	SMARCA4
1.12229e-15	0.351081	0.885	0.542	2.11407e-11	Beta subpopulation 2 and 4 (CD9+)	TXNL1
1.15468e-15	0.461102	0.966	0.868	2.17508e-11	Beta subpopulation 2 and 4 (CD9+)	SNRPF
1.15801e-15	0.385495	1	0.996	2.18135e-11	Beta subpopulation 2 and 4 (CD9+)	PFN1
1.31234e-15	0.437165	0.77	0.452	2.47206e-11	Beta subpopulation 2 and 4 (CD9+)	EIF3D
1.43366e-15	0.468875	0.92	0.673	2.70059e-11	Beta subpopulation 2 and 4 (CD9+)	CDK4
1.69577e-15	0.500705	0.828	0.615	3.19432e-11	Beta subpopulation 2 and 4 (CD9+)	GCSH
1.99699e-15	0.460806	0.828	0.489	3.76173e-11	Beta subpopulation 2 and 4 (CD9+)	FDFT1
2.26522e-15	0.426599	0.782	0.448	4.26699e-11	Beta subpopulation 2 and 4 (CD9+)	HNRNPAB
2.45841e-15	0.488561	0.977	0.78	4.6309e-11	Beta subpopulation 2 and 4 (CD9+)	MYL12A
2.517e-15	0.251058	0.149	0.021	4.74128e-11	Beta subpopulation 2 and 4 (CD9+)	CLDN9
2.92736e-15	0.41925	0.874	0.592	5.51427e-11	Beta subpopulation 2 and 4 (CD9+)	PA2G4
3.00762e-15	0.431924	0.931	0.731	5.66546e-11	Beta subpopulation 2 and 4 (CD9+)	TUFM
3.31816e-15	0.381366	0.77	0.45	6.25041e-11	Beta subpopulation 2 and 4 (CD9+)	NPM3
4.32273e-15	0.350811	0.621	0.279	8.14272e-11	Beta subpopulation 2 and 4 (CD9+)	MIDN
5.08711e-15	0.402871	0.724	0.409	9.58258e-11	Beta subpopulation 2 and 4 (CD9+)	DCTPP1
6.04491e-15	0.321337	1	1	1.13868e-10	Beta subpopulation 2 and 4 (CD9+)	H3F3A
7.0281e-15	0.335524	1	1	1.32388e-10	Beta subpopulation 2 and 4 (CD9+)	ACTG1
7.63253e-15	0.340598	0.517	0.202	1.43774e-10	Beta subpopulation 2 and 4 (CD9+)	PLK2
7.9763e-15	0.473532	0.977	0.785	1.5025e-10	Beta subpopulation 2 and 4 (CD9+)	SRSF2
8.84461e-15	0.349781	0.621	0.282	1.66606e-10	Beta subpopulation 2 and 4 (CD9+)	HEBP1
8.92297e-15	0.451123	0.759	0.429	1.68082e-10	Beta subpopulation 2 and 4 (CD9+)	TUBA1C
9.09843e-15	0.529851	0.103	0.011	1.71387e-10	Beta subpopulation 2 and 4 (CD9+)	SLPI
9.52355e-15	0.337014	1	0.988	1.79395e-10	Beta subpopulation 2 and 4 (CD9+)	SNRPD2
9.80182e-15	0.572644	0.943	0.831	1.84637e-10	Beta subpopulation 2 and 4 (CD9+)	ENO1
1.14503e-14	0.41845	0.92	0.736	2.15689e-10	Beta subpopulation 2 and 4 (CD9+)	YWHAZ
1.24006e-14	0.273011	0.667	0.312	2.33589e-10	Beta subpopulation 2 and 4 (CD9+)	KARS
1.31323e-14	0.429659	0.966	0.851	2.47373e-10	Beta subpopulation 2 and 4 (CD9+)	YWHAB
1.50254e-14	0.654861	0.989	0.995	2.83034e-10	Beta subpopulation 2 and 4 (CD9+)	H2AFZ
1.58704e-14	0.398292	0.839	0.571	2.98951e-10	Beta subpopulation 2 and 4 (CD9+)	KHDRBS1
1.96288e-14	0.630691	0.747	0.522	3.69748e-10	Beta subpopulation 2 and 4 (CD9+)	IGDCC3
1.96431e-14	0.490758	0.885	0.704	3.70017e-10	Beta subpopulation 2 and 4 (CD9+)	RBMX
2.39869e-14	0.266177	0.368	0.114	4.51841e-10	Beta subpopulation 2 and 4 (CD9+)	PKP2
2.83312e-14	0.403103	0.977	0.915	5.33675e-10	Beta subpopulation 2 and 4 (CD9+)	PRELID1
2.89475e-14	0.438777	0.644	0.333	5.45284e-10	Beta subpopulation 2 and 4 (CD9+)	IGFBP2
2.94579e-14	0.277869	0.517	0.208	5.54899e-10	Beta subpopulation 2 and 4 (CD9+)	PABPC4
3.07152e-14	0.469357	0.989	0.964	5.78583e-10	Beta subpopulation 2 and 4 (CD9+)	RAN
3.37009e-14	0.388633	0.954	0.749	6.34823e-10	Beta subpopulation 2 and 4 (CD9+)	SSBP1
3.85097e-14	0.315948	0.253	0.058	7.25407e-10	Beta subpopulation 2 and 4 (CD9+)	GATM
3.95012e-14	0.405377	0.747	0.418	7.44083e-10	Beta subpopulation 2 and 4 (CD9+)	EBPL
4.37859e-14	0.271993	0.563	0.23	8.24795e-10	Beta subpopulation 2 and 4 (CD9+)	ENAH
4.47726e-14	0.427432	0.92	0.73	8.43381e-10	Beta subpopulation 2 and 4 (CD9+)	VDAC1
4.63236e-14	0.264527	0.31	0.086	8.72598e-10	Beta subpopulation 2 and 4 (CD9+)	SULF2
4.66881e-14	0.267524	0.621	0.287	8.79464e-10	Beta subpopulation 2 and 4 (CD9+)	RARS
4.93981e-14	0.332004	0.494	0.199	9.30512e-10	Beta subpopulation 2 and 4 (CD9+)	MAGI1
5.74322e-14	0.411491	0.644	0.319	1.08185e-09	Beta subpopulation 2 and 4 (CD9+)	TUBB4B
6.06258e-14	0.255887	0.483	0.188	1.14201e-09	Beta subpopulation 2 and 4 (CD9+)	DKC1
7.04252e-14	0.353155	0.793	0.474	1.3266e-09	Beta subpopulation 2 and 4 (CD9+)	OLA1
7.6378e-14	0.429322	0.977	0.759	1.43873e-09	Beta subpopulation 2 and 4 (CD9+)	PSMA4
7.85161e-14	0.42737	0.897	0.737	1.47901e-09	Beta subpopulation 2 and 4 (CD9+)	FUS
1.09918e-13	0.27028	0.54	0.233	2.07053e-09	Beta subpopulation 2 and 4 (CD9+)	HAUS1
1.11128e-13	0.368936	0.943	0.826	2.09332e-09	Beta subpopulation 2 and 4 (CD9+)	NHP2
1.33387e-13	0.336278	0.54	0.233	2.51262e-09	Beta subpopulation 2 and 4 (CD9+)	CD47
1.44975e-13	0.494878	0.805	0.547	2.7309e-09	Beta subpopulation 2 and 4 (CD9+)	GGCT
1.50256e-13	0.63169	0.747	0.46	2.83037e-09	Beta subpopulation 2 and 4 (CD9+)	CLDN4
1.6646e-13	0.300933	0.207	0.043	3.1356e-09	Beta subpopulation 2 and 4 (CD9+)	SERPINA5
1.73614e-13	0.416035	0.931	0.806	3.27037e-09	Beta subpopulation 2 and 4 (CD9+)	HNRNPK
1.76553e-13	0.264982	0.586	0.252	3.32572e-09	Beta subpopulation 2 and 4 (CD9+)	VGLL4
1.98089e-13	0.340587	0.517	0.213	3.7314e-09	Beta subpopulation 2 and 4 (CD9+)	KLF3
2.34313e-13	0.365153	0.989	0.893	4.41375e-09	Beta subpopulation 2 and 4 (CD9+)	C14orf166
2.57561e-13	0.43982	0.494	0.211	4.85167e-09	Beta subpopulation 2 and 4 (CD9+)	SMAGP
2.83546e-13	0.290652	0.632	0.31	5.34116e-09	Beta subpopulation 2 and 4 (CD9+)	HN1L
2.8588e-13	0.426611	0.874	0.595	5.38511e-09	Beta subpopulation 2 and 4 (CD9+)	SFPQ
2.88786e-13	0.458637	0.966	0.888	5.43987e-09	Beta subpopulation 2 and 4 (CD9+)	HNRNPA2B1
3.0582e-13	0.403401	0.874	0.642	5.76074e-09	Beta subpopulation 2 and 4 (CD9+)	HNRNPU
3.22918e-13	0.289343	0.621	0.284	6.08281e-09	Beta subpopulation 2 and 4 (CD9+)	SRSF4
3.5751e-13	0.2919	0.494	0.204	6.73442e-09	Beta subpopulation 2 and 4 (CD9+)	MFAP2
3.73666e-13	0.321884	0.736	0.404	7.03875e-09	Beta subpopulation 2 and 4 (CD9+)	TMEM123
3.75967e-13	0.369416	0.218	0.049	7.08209e-09	Beta subpopulation 2 and 4 (CD9+)	CD44
3.82077e-13	0.359551	0.966	0.919	7.19718e-09	Beta subpopulation 2 and 4 (CD9+)	GLTSCR2
3.91281e-13	0.45803	0.816	0.568	7.37055e-09	Beta subpopulation 2 and 4 (CD9+)	SRSF7
3.94196e-13	0.271714	0.54	0.233	7.42547e-09	Beta subpopulation 2 and 4 (CD9+)	PLEKHO1
4.29787e-13	0.34825	0.782	0.453	8.0959e-09	Beta subpopulation 2 and 4 (CD9+)	TAF1D
4.40942e-13	0.463035	0.874	0.729	8.30602e-09	Beta subpopulation 2 and 4 (CD9+)	NME1
4.7653e-13	0.527766	0.46	0.183	8.9764e-09	Beta subpopulation 2 and 4 (CD9+)	FN1
6.52892e-13	0.486844	0.667	0.411	1.22985e-08	Beta subpopulation 2 and 4 (CD9+)	ISYNA1
6.88644e-13	0.321417	0.839	0.576	1.2972e-08	Beta subpopulation 2 and 4 (CD9+)	QARS
7.25757e-13	0.843802	0.126	0.018	1.36711e-08	Beta subpopulation 2 and 4 (CD9+)	TFF2
7.90883e-13	0.398587	0.782	0.483	1.48979e-08	Beta subpopulation 2 and 4 (CD9+)	HNRNPD
9.30212e-13	0.447606	1	0.982	1.75224e-08	Beta subpopulation 2 and 4 (CD9+)	HSP90AA1
9.64667e-13	0.352519	1	0.991	1.81714e-08	Beta subpopulation 2 and 4 (CD9+)	SUMO2
1.12513e-12	0.348928	0.908	0.722	2.11941e-08	Beta subpopulation 2 and 4 (CD9+)	PPP1CA
1.55487e-12	0.39539	0.977	0.903	2.92891e-08	Beta subpopulation 2 and 4 (CD9+)	LSM4
1.60442e-12	0.686611	0.77	0.531	3.02225e-08	Beta subpopulation 2 and 4 (CD9+)	ATP1A1
1.67353e-12	0.311971	0.805	0.495	3.15242e-08	Beta subpopulation 2 and 4 (CD9+)	NELFE
1.67393e-12	0.337114	0.977	0.918	3.15317e-08	Beta subpopulation 2 and 4 (CD9+)	SEC11A
2.1438e-12	0.307495	0.437	0.17	4.03828e-08	Beta subpopulation 2 and 4 (CD9+)	DNAJC9
2.15445e-12	0.315999	0.414	0.154	4.05834e-08	Beta subpopulation 2 and 4 (CD9+)	PRSS23
2.21659e-12	0.381297	0.782	0.504	4.1754e-08	Beta subpopulation 2 and 4 (CD9+)	ILF3
2.3586e-12	1.40212	0.149	0.026	4.4429e-08	Beta subpopulation 2 and 4 (CD9+)	KRT17
2.8883e-12	0.360005	0.851	0.629	5.4407e-08	Beta subpopulation 2 and 4 (CD9+)	C1QBP
3.19039e-12	0.278744	0.46	0.189	6.00974e-08	Beta subpopulation 2 and 4 (CD9+)	LAMC1
3.19401e-12	0.412078	0.69	0.399	6.01656e-08	Beta subpopulation 2 and 4 (CD9+)	NREP
3.28758e-12	0.518217	0.908	0.836	6.19281e-08	Beta subpopulation 2 and 4 (CD9+)	SNRPB
3.84219e-12	0.327679	0.805	0.527	7.23754e-08	Beta subpopulation 2 and 4 (CD9+)	HNRNPR
4.11557e-12	0.353037	0.31	0.093	7.7525e-08	Beta subpopulation 2 and 4 (CD9+)	SPOCK1
4.25009e-12	0.393862	0.839	0.618	8.0059e-08	Beta subpopulation 2 and 4 (CD9+)	RALY
4.54608e-12	0.385663	0.839	0.591	8.56345e-08	Beta subpopulation 2 and 4 (CD9+)	CCT8
5.04504e-12	0.279304	0.701	0.395	9.50335e-08	Beta subpopulation 2 and 4 (CD9+)	TPRKB
5.07289e-12	0.461054	0.908	0.81	9.5558e-08	Beta subpopulation 2 and 4 (CD9+)	ATP5B
5.39813e-12	0.264057	0.494	0.211	1.01685e-07	Beta subpopulation 2 and 4 (CD9+)	RSU1
5.62618e-12	0.330445	0.77	0.486	1.0598e-07	Beta subpopulation 2 and 4 (CD9+)	BOD1
5.97744e-12	0.29326	0.897	0.632	1.12597e-07	Beta subpopulation 2 and 4 (CD9+)	EIF4B
6.02337e-12	0.422464	0.885	0.683	1.13462e-07	Beta subpopulation 2 and 4 (CD9+)	UBE2E3
6.06694e-12	0.397693	0.977	0.878	1.14283e-07	Beta subpopulation 2 and 4 (CD9+)	PTGES3
7.59505e-12	1.43712	0.276	0.079	1.43068e-07	Beta subpopulation 2 and 4 (CD9+)	IFI27
9.03512e-12	0.392576	0.862	0.587	1.70194e-07	Beta subpopulation 2 and 4 (CD9+)	ABRACL
9.52721e-12	0.300813	0.517	0.242	1.79464e-07	Beta subpopulation 2 and 4 (CD9+)	KNOP1
1.09711e-11	0.348356	0.92	0.75	2.06662e-07	Beta subpopulation 2 and 4 (CD9+)	ATF4
1.12857e-11	0.324724	0.897	0.659	2.12589e-07	Beta subpopulation 2 and 4 (CD9+)	NBEAL1
1.18113e-11	0.330186	0.425	0.165	2.22489e-07	Beta subpopulation 2 and 4 (CD9+)	NQO1
1.31978e-11	0.345174	0.701	0.408	2.48607e-07	Beta subpopulation 2 and 4 (CD9+)	PYCR1
1.40552e-11	0.347801	0.931	0.693	2.64758e-07	Beta subpopulation 2 and 4 (CD9+)	UBE2I
1.55705e-11	0.364688	0.678	0.382	2.93302e-07	Beta subpopulation 2 and 4 (CD9+)	LAPTM4B
1.64515e-11	0.27999	0.563	0.26	3.09896e-07	Beta subpopulation 2 and 4 (CD9+)	ZNF581
1.68073e-11	0.398345	0.747	0.455	3.16599e-07	Beta subpopulation 2 and 4 (CD9+)	EZR
1.77549e-11	0.46055	0.598	0.294	3.34449e-07	Beta subpopulation 2 and 4 (CD9+)	PTGR1
1.7818e-11	0.257004	0.621	0.31	3.35638e-07	Beta subpopulation 2 and 4 (CD9+)	NXT1
1.79895e-11	0.301342	0.667	0.374	3.38869e-07	Beta subpopulation 2 and 4 (CD9+)	SNRPA
1.80938e-11	0.315265	0.655	0.366	3.40834e-07	Beta subpopulation 2 and 4 (CD9+)	SYNCRIP
1.84544e-11	0.609673	0.851	0.601	3.47626e-07	Beta subpopulation 2 and 4 (CD9+)	ID2
2.0022e-11	0.378125	0.966	0.886	3.77155e-07	Beta subpopulation 2 and 4 (CD9+)	HNRNPC
2.12467e-11	0.36313	0.897	0.699	4.00224e-07	Beta subpopulation 2 and 4 (CD9+)	LSM3
2.45983e-11	0.358713	0.977	0.899	4.63358e-07	Beta subpopulation 2 and 4 (CD9+)	SNRPD1
2.58581e-11	0.407749	0.977	0.95	4.87089e-07	Beta subpopulation 2 and 4 (CD9+)	DSTN
2.68549e-11	0.343248	0.989	0.93	5.05866e-07	Beta subpopulation 2 and 4 (CD9+)	ATP5O
2.84913e-11	0.33286	0.989	0.937	5.3669e-07	Beta subpopulation 2 and 4 (CD9+)	TXN
3.14013e-11	0.32092	0.816	0.566	5.91506e-07	Beta subpopulation 2 and 4 (CD9+)	EIF3A
3.49059e-11	0.280419	0.793	0.47	6.57522e-07	Beta subpopulation 2 and 4 (CD9+)	PTBP1
3.67799e-11	0.265268	0.736	0.394	6.92823e-07	Beta subpopulation 2 and 4 (CD9+)	U2SURP
4.25377e-11	0.382807	0.839	0.581	8.01283e-07	Beta subpopulation 2 and 4 (CD9+)	IER2
4.5061e-11	0.743711	0.46	0.206	8.48815e-07	Beta subpopulation 2 and 4 (CD9+)	RARRES2
4.57444e-11	0.34163	0.839	0.618	8.61687e-07	Beta subpopulation 2 and 4 (CD9+)	SRSF10
4.89186e-11	0.347533	0.839	0.62	9.2148e-07	Beta subpopulation 2 and 4 (CD9+)	EIF3I
5.03245e-11	0.311476	0.851	0.602	9.47962e-07	Beta subpopulation 2 and 4 (CD9+)	CCT6A
5.64754e-11	0.368095	0.655	0.373	1.06383e-06	Beta subpopulation 2 and 4 (CD9+)	SMC3
5.76313e-11	0.363297	0.713	0.45	1.0856e-06	Beta subpopulation 2 and 4 (CD9+)	PGD
6.05983e-11	0.32246	1	0.93	1.14149e-06	Beta subpopulation 2 and 4 (CD9+)	PSMA7
8.14615e-11	0.271017	0.713	0.402	1.53449e-06	Beta subpopulation 2 and 4 (CD9+)	FNTA
8.24389e-11	0.271262	0.586	0.294	1.5529e-06	Beta subpopulation 2 and 4 (CD9+)	TATDN1
8.42851e-11	0.272535	0.115	0.018	1.58768e-06	Beta subpopulation 2 and 4 (CD9+)	PROCR
8.6044e-11	0.3106	0.862	0.592	1.62081e-06	Beta subpopulation 2 and 4 (CD9+)	LYRM4
1.05078e-10	0.312039	0.816	0.547	1.97935e-06	Beta subpopulation 2 and 4 (CD9+)	RSL1D1
1.10928e-10	0.323479	0.989	0.941	2.08956e-06	Beta subpopulation 2 and 4 (CD9+)	SNRPG
1.15727e-10	0.298738	0.931	0.846	2.17995e-06	Beta subpopulation 2 and 4 (CD9+)	ST13
1.41905e-10	0.370754	0.897	0.718	2.67307e-06	Beta subpopulation 2 and 4 (CD9+)	RBM8A
1.53979e-10	0.611445	0.989	0.955	2.90051e-06	Beta subpopulation 2 and 4 (CD9+)	S100A11
1.61779e-10	0.326503	0.667	0.385	3.04743e-06	Beta subpopulation 2 and 4 (CD9+)	IDH1
1.70142e-10	0.276504	0.621	0.325	3.20496e-06	Beta subpopulation 2 and 4 (CD9+)	SNRPA1
1.89162e-10	0.314092	0.92	0.828	3.56324e-06	Beta subpopulation 2 and 4 (CD9+)	LSM2
2.23508e-10	0.266812	0.575	0.297	4.21022e-06	Beta subpopulation 2 and 4 (CD9+)	PAWR
2.54146e-10	0.299245	0.586	0.328	4.78735e-06	Beta subpopulation 2 and 4 (CD9+)	RBPJ
2.78213e-10	0.298377	0.552	0.27	5.24069e-06	Beta subpopulation 2 and 4 (CD9+)	H2AFX
2.8276e-10	0.326748	0.92	0.696	5.32634e-06	Beta subpopulation 2 and 4 (CD9+)	RSL24D1
3.96994e-10	0.275536	0.816	0.517	7.47817e-06	Beta subpopulation 2 and 4 (CD9+)	TRIAP1
4.32733e-10	0.289368	0.667	0.379	8.1514e-06	Beta subpopulation 2 and 4 (CD9+)	EWSR1
4.52915e-10	0.283753	0.713	0.434	8.53156e-06	Beta subpopulation 2 and 4 (CD9+)	PBX1
5.8177e-10	0.3336	0.828	0.574	1.09588e-05	Beta subpopulation 2 and 4 (CD9+)	RPA3
5.83216e-10	0.275122	0.54	0.275	1.0986e-05	Beta subpopulation 2 and 4 (CD9+)	PPIL1
7.20402e-10	0.320079	0.667	0.391	1.35702e-05	Beta subpopulation 2 and 4 (CD9+)	AMD1
7.69134e-10	0.300336	0.678	0.402	1.44882e-05	Beta subpopulation 2 and 4 (CD9+)	TCP1
8.52852e-10	0.378036	0.414	0.183	1.60652e-05	Beta subpopulation 2 and 4 (CD9+)	SSFA2
8.9298e-10	0.251482	0.678	0.396	1.68211e-05	Beta subpopulation 2 and 4 (CD9+)	MRPL19
1.01531e-09	0.364299	0.609	0.351	1.91254e-05	Beta subpopulation 2 and 4 (CD9+)	PON2
1.03098e-09	0.255801	1	0.978	1.94206e-05	Beta subpopulation 2 and 4 (CD9+)	COMMD6
1.05512e-09	0.290786	0.747	0.492	1.98754e-05	Beta subpopulation 2 and 4 (CD9+)	GLO1
1.09043e-09	0.308009	0.874	0.72	2.05405e-05	Beta subpopulation 2 and 4 (CD9+)	GDI2
1.13999e-09	0.276676	0.598	0.327	2.1474e-05	Beta subpopulation 2 and 4 (CD9+)	SKA2
1.20188e-09	0.271248	0.471	0.222	2.26397e-05	Beta subpopulation 2 and 4 (CD9+)	ID4
1.6354e-09	0.305156	0.747	0.479	3.0806e-05	Beta subpopulation 2 and 4 (CD9+)	C11orf73
1.66744e-09	0.285888	0.874	0.696	3.14096e-05	Beta subpopulation 2 and 4 (CD9+)	PPA1
1.77684e-09	0.298907	0.609	0.345	3.34703e-05	Beta subpopulation 2 and 4 (CD9+)	FAM60A
1.78015e-09	0.269444	0.759	0.51	3.35326e-05	Beta subpopulation 2 and 4 (CD9+)	LSM6
1.80914e-09	0.269327	0.655	0.374	3.40787e-05	Beta subpopulation 2 and 4 (CD9+)	ADH5
2.29471e-09	0.344117	0.839	0.594	4.32255e-05	Beta subpopulation 2 and 4 (CD9+)	HEBP2
2.30553e-09	0.280311	0.46	0.219	4.34292e-05	Beta subpopulation 2 and 4 (CD9+)	GLTP
2.57794e-09	0.3215	0.839	0.587	4.85607e-05	Beta subpopulation 2 and 4 (CD9+)	KPNB1
2.66427e-09	0.262728	0.506	0.247	5.01868e-05	Beta subpopulation 2 and 4 (CD9+)	HILPDA
3.16026e-09	0.307296	0.966	0.878	5.95299e-05	Beta subpopulation 2 and 4 (CD9+)	ATP5A1
3.23981e-09	0.376948	0.874	0.736	6.10283e-05	Beta subpopulation 2 and 4 (CD9+)	HN1
3.33194e-09	0.338276	0.92	0.734	6.27637e-05	Beta subpopulation 2 and 4 (CD9+)	NONO
3.72632e-09	0.307084	0.713	0.476	7.01926e-05	Beta subpopulation 2 and 4 (CD9+)	PTPRF
4.08499e-09	0.252946	0.598	0.336	7.6949e-05	Beta subpopulation 2 and 4 (CD9+)	ADSL
4.21947e-09	0.411062	0.609	0.39	7.94821e-05	Beta subpopulation 2 and 4 (CD9+)	LDHA
4.29634e-09	1.02975	0.805	0.652	8.09302e-05	Beta subpopulation 2 and 4 (CD9+)	HIST1H4C
4.88336e-09	0.443912	0.517	0.268	9.19878e-05	Beta subpopulation 2 and 4 (CD9+)	C8orf4
5.10368e-09	0.274592	0.966	0.836	9.61379e-05	Beta subpopulation 2 and 4 (CD9+)	SRSF9
5.44744e-09	0.393862	0.92	0.794	0.000102613	Beta subpopulation 2 and 4 (CD9+)	NUCKS1
5.79314e-09	0.274984	0.862	0.716	0.000109125	Beta subpopulation 2 and 4 (CD9+)	MPST
6.89579e-09	0.283128	0.943	0.776	0.000129896	Beta subpopulation 2 and 4 (CD9+)	PHB
7.30427e-09	0.280459	0.931	0.854	0.000137591	Beta subpopulation 2 and 4 (CD9+)	ERGIC3
8.67028e-09	0.281975	0.885	0.718	0.000163322	Beta subpopulation 2 and 4 (CD9+)	SRSF11
9.3367e-09	0.266408	0.77	0.515	0.000175875	Beta subpopulation 2 and 4 (CD9+)	ANP32A
9.80975e-09	0.307876	0.908	0.743	0.000184786	Beta subpopulation 2 and 4 (CD9+)	PCBP1
9.95726e-09	0.318827	0.874	0.643	0.000187565	Beta subpopulation 2 and 4 (CD9+)	ARGLU1
1.00277e-08	0.510274	0.195	0.056	0.000188893	Beta subpopulation 2 and 4 (CD9+)	LYZ
1.12196e-08	0.287409	0.126	0.026	0.000211343	Beta subpopulation 2 and 4 (CD9+)	GPRC5A
1.13529e-08	0.362806	0.701	0.481	0.000213854	Beta subpopulation 2 and 4 (CD9+)	ETHE1
1.14078e-08	0.313152	0.782	0.573	0.000214889	Beta subpopulation 2 and 4 (CD9+)	RAB34
1.16436e-08	0.258983	1	0.998	0.00021933	Beta subpopulation 2 and 4 (CD9+)	H3F3B
1.46363e-08	0.271144	0.874	0.653	0.000275703	Beta subpopulation 2 and 4 (CD9+)	PPM1G
1.54703e-08	0.296916	0.69	0.443	0.000291415	Beta subpopulation 2 and 4 (CD9+)	MCL1
1.91199e-08	0.370796	0.805	0.669	0.000360161	Beta subpopulation 2 and 4 (CD9+)	AHCY
2.23626e-08	0.285143	0.92	0.812	0.000421244	Beta subpopulation 2 and 4 (CD9+)	TMEM160
2.25926e-08	0.289887	0.368	0.158	0.000425576	Beta subpopulation 2 and 4 (CD9+)	ATF3
2.4155e-08	0.256914	0.759	0.557	0.000455007	Beta subpopulation 2 and 4 (CD9+)	CCDC167
2.46732e-08	0.306236	0.897	0.76	0.000464768	Beta subpopulation 2 and 4 (CD9+)	STOML2
2.66172e-08	0.468264	1	0.992	0.000501387	Beta subpopulation 2 and 4 (CD9+)	HMGN2
2.83937e-08	0.274828	0.563	0.329	0.000534852	Beta subpopulation 2 and 4 (CD9+)	MYH9
2.84668e-08	0.424527	0.253	0.086	0.000536229	Beta subpopulation 2 and 4 (CD9+)	MIR4435-2HG
2.9634e-08	0.290526	0.724	0.478	0.000558216	Beta subpopulation 2 and 4 (CD9+)	PNN
3.02638e-08	0.338778	0.621	0.379	0.00057008	Beta subpopulation 2 and 4 (CD9+)	ANXA11
3.3035e-08	0.349345	0.736	0.559	0.00062228	Beta subpopulation 2 and 4 (CD9+)	SSB
3.68605e-08	0.26569	0.862	0.702	0.000694342	Beta subpopulation 2 and 4 (CD9+)	FDPS
3.7067e-08	0.293297	0.483	0.25	0.000698231	Beta subpopulation 2 and 4 (CD9+)	MTHFD2
3.78888e-08	0.327095	0.885	0.777	0.000713711	Beta subpopulation 2 and 4 (CD9+)	NME4
3.8912e-08	0.309091	0.644	0.417	0.000732985	Beta subpopulation 2 and 4 (CD9+)	MAT2A
3.9086e-08	0.415849	0.874	0.749	0.000736262	Beta subpopulation 2 and 4 (CD9+)	CKB
4.01603e-08	0.469579	0.701	0.52	0.000756499	Beta subpopulation 2 and 4 (CD9+)	ZFP36L2
4.24772e-08	0.306357	0.667	0.446	0.000800142	Beta subpopulation 2 and 4 (CD9+)	CCT5
5.17587e-08	0.274313	0.793	0.559	0.000974979	Beta subpopulation 2 and 4 (CD9+)	IGF2BP2
5.68963e-08	0.291816	0.816	0.597	0.00107176	Beta subpopulation 2 and 4 (CD9+)	RHOC
5.80204e-08	0.285488	0.816	0.592	0.00109293	Beta subpopulation 2 and 4 (CD9+)	PSMC3
5.87332e-08	0.310246	0.931	0.706	0.00110636	Beta subpopulation 2 and 4 (CD9+)	TALDO1
6.25731e-08	0.311892	0.701	0.476	0.00117869	Beta subpopulation 2 and 4 (CD9+)	HNRNPH3
6.60361e-08	0.270827	0.954	0.942	0.00124392	Beta subpopulation 2 and 4 (CD9+)	YWHAE
6.84251e-08	0.37334	0.402	0.19	0.00128892	Beta subpopulation 2 and 4 (CD9+)	GPC3
6.85235e-08	0.315653	0.897	0.749	0.00129078	Beta subpopulation 2 and 4 (CD9+)	H2AFV
7.49232e-08	0.304692	0.874	0.687	0.00141133	Beta subpopulation 2 and 4 (CD9+)	PPP1CC
8.09352e-08	0.25273	0.931	0.768	0.00152458	Beta subpopulation 2 and 4 (CD9+)	H2AFY
9.52887e-08	1.43138	0.092	0.016	0.00179495	Beta subpopulation 2 and 4 (CD9+)	RBP2
9.69241e-08	0.26094	0.897	0.774	0.00182576	Beta subpopulation 2 and 4 (CD9+)	PHB2
1.12913e-07	0.254979	0.713	0.496	0.00212694	Beta subpopulation 2 and 4 (CD9+)	PSMD11
1.21996e-07	0.2602	0.793	0.562	0.00229804	Beta subpopulation 2 and 4 (CD9+)	XRCC6
1.28967e-07	0.254176	0.586	0.36	0.00242934	Beta subpopulation 2 and 4 (CD9+)	PHF5A
1.35637e-07	0.269221	0.747	0.531	0.00255498	Beta subpopulation 2 and 4 (CD9+)	CCT7
1.46803e-07	0.293843	0.736	0.531	0.00276532	Beta subpopulation 2 and 4 (CD9+)	PARP1
1.51547e-07	0.251156	0.701	0.462	0.00285469	Beta subpopulation 2 and 4 (CD9+)	TAX1BP3
1.55657e-07	0.418215	0.828	0.694	0.0029321	Beta subpopulation 2 and 4 (CD9+)	EIF4EBP1
1.77328e-07	0.26053	0.954	0.864	0.00334032	Beta subpopulation 2 and 4 (CD9+)	SIVA1
1.8371e-07	0.256062	0.92	0.829	0.00346055	Beta subpopulation 2 and 4 (CD9+)	PSMB7
1.91243e-07	0.302882	0.805	0.615	0.00360244	Beta subpopulation 2 and 4 (CD9+)	PSMA3
2.2402e-07	0.263375	0.713	0.513	0.00421986	Beta subpopulation 2 and 4 (CD9+)	TRA2B
2.83604e-07	0.252582	0.621	0.409	0.00534225	Beta subpopulation 2 and 4 (CD9+)	GLRX3
2.97413e-07	0.328971	0.77	0.536	0.00560236	Beta subpopulation 2 and 4 (CD9+)	ACTN4
3.24068e-07	0.489017	0.793	0.612	0.00610447	Beta subpopulation 2 and 4 (CD9+)	HES4
3.67177e-07	0.286602	0.805	0.666	0.00691651	Beta subpopulation 2 and 4 (CD9+)	PRRC2C
3.84498e-07	0.252701	0.954	0.811	0.00724279	Beta subpopulation 2 and 4 (CD9+)	ATP5C1
3.90095e-07	0.279214	0.759	0.611	0.00734823	Beta subpopulation 2 and 4 (CD9+)	UQCRC1
3.93408e-07	0.254763	0.851	0.772	0.00741062	Beta subpopulation 2 and 4 (CD9+)	GTF2I
4.0276e-07	0.257227	0.701	0.498	0.00758679	Beta subpopulation 2 and 4 (CD9+)	CCT2
4.61723e-07	0.290917	0.678	0.48	0.00869747	Beta subpopulation 2 and 4 (CD9+)	HNRNPF
5.26636e-07	0.84577	0.207	0.074	0.00992025	Beta subpopulation 2 and 4 (CD9+)	CXCL1
5.49094e-07	0.254739	0.747	0.524	0.0103433	Beta subpopulation 2 and 4 (CD9+)	SMARCE1
5.79669e-07	0.266744	0.77	0.532	0.0109192	Beta subpopulation 2 and 4 (CD9+)	PNRC1
7.13819e-07	0.257482	0.333	0.156	0.0134462	Beta subpopulation 2 and 4 (CD9+)	SLC20A1
7.55555e-07	0.283785	0.736	0.55	0.0142324	Beta subpopulation 2 and 4 (CD9+)	AKR1B1
8.04393e-07	0.277195	0.759	0.581	0.0151523	Beta subpopulation 2 and 4 (CD9+)	CCT4
9.41849e-07	0.298033	0.805	0.684	0.0177416	Beta subpopulation 2 and 4 (CD9+)	ARL6IP1
1.08325e-06	0.309855	0.264	0.106	0.0204051	Beta subpopulation 2 and 4 (CD9+)	AGR2
1.2932e-06	0.387856	0.575	0.365	0.02436	Beta subpopulation 2 and 4 (CD9+)	SPTBN1
1.47213e-06	0.284587	0.575	0.362	0.0277305	Beta subpopulation 2 and 4 (CD9+)	NUDT4
1.48594e-06	0.26836	0.816	0.64	0.0279906	Beta subpopulation 2 and 4 (CD9+)	XRCC5
1.60949e-06	0.268885	0.759	0.598	0.030318	Beta subpopulation 2 and 4 (CD9+)	SRRM1
1.66475e-06	0.565389	0.529	0.355	0.0313588	Beta subpopulation 2 and 4 (CD9+)	ELF3
1.74403e-06	0.370978	0.736	0.587	0.0328523	Beta subpopulation 2 and 4 (CD9+)	MRPS6
1.99584e-06	0.266474	0.655	0.438	0.0375957	Beta subpopulation 2 and 4 (CD9+)	THRAP3
2.65904e-06	0.266556	0.644	0.474	0.0500883	Beta subpopulation 2 and 4 (CD9+)	CALU
2.98618e-06	0.256905	0.793	0.57	0.0562506	Beta subpopulation 2 and 4 (CD9+)	PHF14
3.20852e-06	0.850897	0.931	0.84	0.060439	Beta subpopulation 2 and 4 (CD9+)	IGF2
4.38972e-06	0.256922	0.609	0.398	0.0826891	Beta subpopulation 2 and 4 (CD9+)	SYPL1
4.91507e-06	0.277956	0.92	0.845	0.0925852	Beta subpopulation 2 and 4 (CD9+)	PDIA6
5.11984e-06	0.258373	0.954	0.909	0.0964424	Beta subpopulation 2 and 4 (CD9+)	HSPA8
5.78791e-06	0.312335	0.793	0.649	0.109027	Beta subpopulation 2 and 4 (CD9+)	RPN2
6.21847e-06	0.432098	0.816	0.65	0.117137	Beta subpopulation 2 and 4 (CD9+)	PDLIM1
8.84111e-06	0.258175	0.356	0.18	0.16654	Beta subpopulation 2 and 4 (CD9+)	DSC2
9.86164e-06	0.344648	0.69	0.533	0.185764	Beta subpopulation 2 and 4 (CD9+)	KLF6
1.14707e-05	0.469542	0.299	0.149	0.216073	Beta subpopulation 2 and 4 (CD9+)	GPR160
1.23433e-05	0.303106	0.391	0.221	0.232511	Beta subpopulation 2 and 4 (CD9+)	BST2
1.27333e-05	0.264721	0.701	0.541	0.239857	Beta subpopulation 2 and 4 (CD9+)	SMS
1.4783e-05	0.26015	0.943	0.836	0.278466	Beta subpopulation 2 and 4 (CD9+)	CYB5A
1.6921e-05	0.25244	0.816	0.638	0.318741	Beta subpopulation 2 and 4 (CD9+)	MED28
1.84624e-05	0.250539	0.816	0.674	0.347776	Beta subpopulation 2 and 4 (CD9+)	PRMT1
1.87287e-05	0.269188	0.448	0.275	0.352793	Beta subpopulation 2 and 4 (CD9+)	TSHZ2
1.95799e-05	1.1665	0.862	0.887	0.368826	Beta subpopulation 2 and 4 (CD9+)	S100A10
2.40996e-05	2.16948	0.184	0.07	0.453965	Beta subpopulation 2 and 4 (CD9+)	S100A9
2.68368e-05	0.251766	0.851	0.765	0.505526	Beta subpopulation 2 and 4 (CD9+)	PAFAH1B3
2.8719e-05	0.284109	0.264	0.126	0.54098	Beta subpopulation 2 and 4 (CD9+)	MAP3K8
2.87765e-05	0.35789	0.368	0.206	0.542062	Beta subpopulation 2 and 4 (CD9+)	B4GALT1
3.235e-05	0.70459	0.77	0.705	0.609377	Beta subpopulation 2 and 4 (CD9+)	S100A16
3.35331e-05	0.261919	0.356	0.196	0.631664	Beta subpopulation 2 and 4 (CD9+)	NDRG2
3.39684e-05	0.29565	0.782	0.635	0.639862	Beta subpopulation 2 and 4 (CD9+)	RCN1
3.67399e-05	0.474273	0.782	0.668	0.692069	Beta subpopulation 2 and 4 (CD9+)	GSTO1
6.73236e-05	0.25333	0.471	0.303	1	Beta subpopulation 2 and 4 (CD9+)	IFT57
0.000147978	0.254408	0.667	0.565	1	Beta subpopulation 2 and 4 (CD9+)	DNAJC8
0.000282475	0.585269	0.184	0.081	1	Beta subpopulation 2 and 4 (CD9+)	CXCL14
0.00028688	0.347124	0.736	0.637	1	Beta subpopulation 2 and 4 (CD9+)	DUT
0.000302487	0.272349	0.655	0.5	1	Beta subpopulation 2 and 4 (CD9+)	EGR1
0.000303315	0.257536	0.31	0.177	1	Beta subpopulation 2 and 4 (CD9+)	SLC2A3
0.000390775	0.251883	0.391	0.251	1	Beta subpopulation 2 and 4 (CD9+)	PHLDA1
0.000428007	0.466911	0.989	0.976	1	Beta subpopulation 2 and 4 (CD9+)	LY6E
0.000771575	0.556834	0.931	0.956	1	Beta subpopulation 2 and 4 (CD9+)	WFDC2
0.00100759	0.327377	0.678	0.522	1	Beta subpopulation 2 and 4 (CD9+)	RAB11FIP1
0.00122591	0.400901	0.161	0.073	1	Beta subpopulation 2 and 4 (CD9+)	LGALS1
0.00203637	0.373487	0.333	0.219	1	Beta subpopulation 2 and 4 (CD9+)	DDIT4
0.00272756	0.250864	1	0.909	1	Beta subpopulation 2 and 4 (CD9+)	MYL12B
0.00311672	0.344469	0.08	0.028	1	Beta subpopulation 2 and 4 (CD9+)	FGB
0.0134865	0.262827	0.402	0.319	1	Beta subpopulation 2 and 4 (CD9+)	QSOX1
0.0230471	0.567547	0.345	0.277	1	Beta subpopulation 2 and 4 (CD9+)	GDF15

## Sheet: Igf2+ seBC
p_val	avg_logFC	pct.1	pct.2	p_val_adj	cluster	gene
4.33163e-165	0.657965	0.603	0.072	8.15948e-161	Igf2+	EFNA4
3.18802e-153	0.850922	0.681	0.11	6.00528e-149	Igf2+	MMP23B
1.92541e-148	0.546002	0.547	0.065	3.62689e-144	Igf2+	SLC22A31
3.02246e-144	0.497927	0.414	0.032	5.69341e-140	Igf2+	FAM132A
9.27785e-137	1.2472	0.651	0.113	1.74767e-132	Igf2+	ZG16B
1.0618e-124	0.95105	0.759	0.192	2.00012e-120	Igf2+	MXRA8
6.20358e-123	1.34331	1	0.961	1.16857e-118	Igf2+	EGFL7
1.31953e-120	1.07842	0.909	0.337	2.48559e-116	Igf2+	PLAGL1
1.1733e-116	0.34074	0.44	0.049	2.21014e-112	Igf2+	RP11-881M11.4
1.41193e-116	1.88031	0.996	0.833	2.65965e-112	Igf2+	IGF2
2.49607e-109	0.254952	0.259	0.014	4.70184e-105	Igf2+	HHATL
1.9478e-108	0.376687	0.422	0.05	3.66907e-104	Igf2+	COL5A1
5.23187e-98	1.14657	0.647	0.161	9.85528e-94	Igf2+	ECEL1
7.33154e-95	0.901634	1	1	1.38104e-90	Igf2+	MDK
9.30305e-92	0.519102	0.547	0.112	1.75241e-87	Igf2+	EMID1
1.42891e-88	0.305562	0.384	0.051	2.69163e-84	Igf2+	KNDC1
7.23067e-82	0.51816	0.5	0.1	1.36204e-77	Igf2+	AMN
1.80393e-80	0.743992	0.983	0.789	3.39806e-76	Igf2+	PDCD5
3.93528e-79	0.438386	0.483	0.095	7.41289e-75	Igf2+	SGCA
5.1699e-76	1.07872	0.897	0.558	9.73853e-72	Igf2+	PDLIM2
1.72385e-75	0.831408	0.849	0.438	3.24722e-71	Igf2+	PPP6R1
8.72927e-75	0.800825	1	0.966	1.64433e-70	Igf2+	SELM
7.39697e-73	0.683426	0.996	0.94	1.39337e-68	Igf2+	GCHFR
2.75809e-71	0.690086	0.983	0.779	5.19542e-67	Igf2+	AGPAT2
3.85352e-71	1.17494	0.94	0.764	7.25888e-67	Igf2+	TMEM190
5.39085e-71	1.38256	0.935	0.717	1.01547e-66	Igf2+	TFF3
8.19049e-70	0.645999	0.97	0.676	1.54284e-65	Igf2+	PPP1R16A
8.48885e-63	0.721672	0.849	0.478	1.59905e-58	Igf2+	COMT
3.76963e-62	0.370437	0.366	0.068	7.10085e-58	Igf2+	MFAP4
1.27894e-60	2.01071	0.875	0.646	2.40914e-56	Igf2+	RBP4
2.81062e-59	0.473077	0.569	0.18	5.29437e-55	Igf2+	AVP
6.54317e-58	0.606561	0.724	0.325	1.23254e-53	Igf2+	S100A4
1.8213e-57	0.702726	0.659	0.251	3.43079e-53	Igf2+	SCT
7.05853e-57	0.417348	0.681	0.258	1.32961e-52	Igf2+	HSBP1L1
7.81052e-57	0.483579	0.578	0.177	1.47127e-52	Igf2+	NPPC
9.41343e-57	0.585565	0.668	0.28	1.77321e-52	Igf2+	EMP2
1.66197e-55	0.299179	0.401	0.089	3.13065e-51	Igf2+	FAM92B
1.94331e-55	0.526717	0.987	0.943	3.6606e-51	Igf2+	TBCB
2.5724e-55	0.720615	0.944	0.764	4.84562e-51	Igf2+	DGCR6L
1.69305e-51	0.984455	0.853	0.577	3.1892e-47	Igf2+	RP11-788H18.1
9.65831e-49	0.975946	0.866	0.643	1.81934e-44	Igf2+	SMIM24
2.38996e-48	0.716055	0.991	0.961	4.50196e-44	Igf2+	SAT1
3.86924e-48	0.623327	0.81	0.511	7.28849e-44	Igf2+	MFGE8
5.29377e-47	0.59978	0.879	0.634	9.97187e-43	Igf2+	SMIM1
1.02391e-46	0.43608	0.586	0.229	1.92874e-42	Igf2+	TSPAN32
1.84067e-46	0.5213	0.569	0.214	3.46727e-42	Igf2+	NR0B2
5.35275e-44	0.302731	1	1	1.0083e-39	Igf2+	ATP5E
3.19222e-43	0.570883	0.659	0.307	6.01318e-39	Igf2+	HADH
2.09524e-41	0.396704	1	0.981	3.9468e-37	Igf2+	GUK1
3.80286e-41	0.39072	0.991	0.972	7.16345e-37	Igf2+	STARD10
2.48644e-40	0.514115	0.914	0.678	4.6837e-36	Igf2+	ASS1
8.61183e-40	0.455789	0.957	0.831	1.62221e-35	Igf2+	CYB5A
1.78953e-39	0.575754	0.409	0.124	3.37093e-35	Igf2+	TFF1
4.32847e-39	0.662371	0.996	0.977	8.15354e-35	Igf2+	GNAS
3.20638e-37	0.421758	0.996	0.944	6.03985e-33	Igf2+	NDUFA4
6.36252e-37	0.550772	0.978	0.914	1.19851e-32	Igf2+	TIMP1
3.6033e-36	0.313152	0.509	0.197	6.78753e-32	Igf2+	MAP4K2
2.50693e-34	0.364467	1	0.993	4.72231e-30	Igf2+	DBI
8.61222e-34	0.464063	0.957	0.863	1.62228e-29	Igf2+	TMED10
2.31828e-33	0.430087	0.289	0.073	4.36694e-29	Igf2+	NPB
2.58284e-33	0.390313	0.987	0.925	4.86529e-29	Igf2+	MSRB1
5.42404e-33	0.594642	0.866	0.65	1.02173e-28	Igf2+	BAALC
6.91206e-33	0.296758	0.414	0.144	1.30202e-28	Igf2+	SFI1
4.5005e-31	0.384102	0.978	0.898	8.4776e-27	Igf2+	SURF4
4.99508e-31	0.376093	0.974	0.887	9.40924e-27	Igf2+	VAMP8
1.66788e-30	0.492799	0.724	0.457	3.14179e-26	Igf2+	GCK
2.5037e-30	0.29092	0.453	0.174	4.71623e-26	Igf2+	SOCS1
3.26516e-30	0.862193	0.819	0.621	6.15057e-26	Igf2+	FXYD3
4.43507e-30	0.46023	0.853	0.632	8.35434e-26	Igf2+	SLC29A1
5.51512e-30	0.337693	1	1	1.03888e-25	Igf2+	FTL
1.36732e-29	0.337614	0.651	0.353	2.57563e-25	Igf2+	CD68
6.54844e-29	0.283536	0.474	0.195	1.23353e-24	Igf2+	SPOCK2
2.06999e-28	0.466657	0.892	0.776	3.89924e-24	Igf2+	TM7SF2
2.45078e-27	0.393215	0.612	0.325	4.61654e-23	Igf2+	CYSLTR2
7.02696e-27	0.2951	0.487	0.216	1.32367e-22	Igf2+	REEP6
6.07319e-26	0.381729	0.828	0.646	1.14401e-21	Igf2+	KHK
6.40153e-26	0.265887	0.487	0.219	1.20586e-21	Igf2+	RIIAD1
2.1683e-25	0.326185	1	0.986	4.08443e-21	Igf2+	SPINT2
6.32108e-25	0.30946	0.582	0.32	1.1907e-20	Igf2+	PRR5
6.71213e-25	0.415938	0.483	0.232	1.26436e-20	Igf2+	TSC22D3
9.89379e-25	0.319211	1	0.995	1.86369e-20	Igf2+	FKBP2
1.05528e-24	0.257349	0.53	0.261	1.98782e-20	Igf2+	PRKCZ
1.85695e-24	0.30275	0.664	0.382	3.49794e-20	Igf2+	OLFM1
1.91886e-24	0.304816	0.543	0.279	3.61455e-20	Igf2+	DGKZ
2.46308e-24	0.337189	0.987	0.944	4.63971e-20	Igf2+	TMED3
3.16956e-24	0.280528	0.664	0.392	5.97049e-20	Igf2+	PTRH1
4.93325e-24	0.305917	0.991	0.975	9.29276e-20	Igf2+	VKORC1
5.66598e-24	0.345084	0.69	0.441	1.0673e-19	Igf2+	ESPN
4.79171e-23	0.381503	0.935	0.793	9.02614e-19	Igf2+	CCS
7.70046e-23	0.320801	0.841	0.662	1.45054e-18	Igf2+	PRKCDBP
1.64687e-22	0.357229	0.776	0.589	3.10221e-18	Igf2+	HEBP2
2.13495e-22	0.274072	1	0.994	4.02161e-18	Igf2+	BSG
3.11882e-22	0.308358	0.836	0.644	5.87492e-18	Igf2+	TESC
3.29825e-22	0.330916	0.987	0.965	6.21291e-18	Igf2+	SSR2
5.0144e-22	0.342615	0.944	0.845	9.44563e-18	Igf2+	MANF
5.39911e-22	0.271078	0.487	0.231	1.01703e-17	Igf2+	TFPI
6.13771e-22	0.345912	0.746	0.516	1.15616e-17	Igf2+	TSPAN5
9.6846e-22	0.387084	0.823	0.683	1.82429e-17	Igf2+	NINJ1
1.25177e-21	0.362404	0.815	0.621	2.35797e-17	Igf2+	CIDEB
1.63323e-21	0.479534	0.733	0.524	3.07652e-17	Igf2+	TGFBR3L
2.4604e-20	0.267974	1	0.976	4.63465e-16	Igf2+	TMEM258
5.87377e-20	0.252814	1	1	1.10644e-15	Igf2+	SSR4
7.028e-20	0.351998	0.901	0.724	1.32386e-15	Igf2+	SMIM5
9.23961e-20	0.25056	0.522	0.283	1.74047e-15	Igf2+	ANKRD65
9.29922e-20	0.278194	0.974	0.888	1.75169e-15	Igf2+	OCIAD2
2.97985e-19	0.388397	0.733	0.565	5.61315e-15	Igf2+	LDOC1
1.04372e-18	0.310447	0.75	0.556	1.96605e-14	Igf2+	KISS1
1.27672e-18	0.290868	0.987	0.945	2.40495e-14	Igf2+	SDF2L1
1.4345e-18	0.389114	0.772	0.564	2.70217e-14	Igf2+	BTBD17
3.97924e-18	0.278775	0.672	0.443	7.4957e-14	Igf2+	KLHDC8B
5.06103e-18	0.292427	0.763	0.549	9.53346e-14	Igf2+	CCDC167
9.60656e-18	0.273209	0.987	0.933	1.80959e-13	Igf2+	EIF3E
2.49403e-17	0.385276	0.978	0.966	4.69801e-13	Igf2+	S100A6
5.03335e-17	0.277063	0.944	0.711	9.48133e-13	Igf2+	PCDH7
6.06278e-17	0.326549	0.608	0.402	1.14205e-12	Igf2+	PYCR1
7.46028e-17	0.359383	0.836	0.681	1.40529e-12	Igf2+	CDC42EP3
7.49879e-17	0.254921	0.94	0.857	1.41255e-12	Igf2+	CYB5R3
1.09285e-16	0.33978	0.832	0.679	2.0586e-12	Igf2+	CHST9
1.2375e-16	0.266751	0.991	0.97	2.33108e-12	Igf2+	P4HB
1.71468e-16	0.250664	0.957	0.895	3.22994e-12	Igf2+	KDELR2
1.81327e-16	0.276772	0.78	0.59	3.41566e-12	Igf2+	TMEM86B
4.78265e-16	0.251265	0.862	0.69	9.00908e-12	Igf2+	CDKN1C
9.70502e-16	0.260907	0.97	0.921	1.82813e-11	Igf2+	DAD1
1.18136e-15	0.279969	0.905	0.834	2.22533e-11	Igf2+	PLP2
1.28176e-15	0.27669	0.948	0.902	2.41445e-11	Igf2+	CHMP2A
1.47079e-15	0.263149	0.991	0.915	2.77053e-11	Igf2+	ERO1B
1.72401e-15	0.252957	0.866	0.726	3.24751e-11	Igf2+	VDAC1
1.90174e-15	0.310894	0.625	0.433	3.58231e-11	Igf2+	ODC1
2.48997e-15	0.289921	0.914	0.862	4.69036e-11	Igf2+	TMED9
4.23741e-15	0.252969	0.966	0.903	7.98201e-11	Igf2+	OSTC
4.4855e-15	0.264148	0.75	0.552	8.44934e-11	Igf2+	GOLM1
4.74904e-15	0.355331	0.608	0.409	8.94577e-11	Igf2+	FABP1
7.15462e-15	0.268009	0.871	0.741	1.34772e-10	Igf2+	CLDN7
7.69506e-15	0.319711	0.629	0.442	1.44952e-10	Igf2+	PTP4A3
8.10279e-15	0.308045	0.328	0.153	1.52632e-10	Igf2+	NKAIN4
2.55429e-14	0.26841	0.909	0.813	4.81152e-10	Igf2+	CD81
4.71669e-14	0.317891	0.961	0.918	8.88483e-10	Igf2+	CALY
6.68599e-14	0.425181	0.461	0.262	1.25944e-09	Igf2+	C8orf4
1.04058e-13	0.270861	0.754	0.598	1.96014e-09	Igf2+	RBMX2
1.45961e-13	0.275671	0.991	0.935	2.74947e-09	Igf2+	SF3B5
1.95641e-13	0.257932	0.914	0.831	3.68529e-09	Igf2+	ASAH1
2.94553e-13	0.272732	0.677	0.503	5.54849e-09	Igf2+	C20orf27
4.5048e-13	0.250935	0.181	0.062	8.4857e-09	Igf2+	COL20A1
2.50528e-12	0.255067	0.707	0.517	4.71919e-08	Igf2+	IGDCC3
2.51884e-12	0.251351	0.366	0.197	4.74474e-08	Igf2+	CTHRC1
4.39997e-12	0.269626	0.728	0.559	8.28822e-08	Igf2+	PARVB
1.03122e-11	0.269417	0.586	0.395	1.94251e-07	Igf2+	APOB
6.91658e-11	0.29042	0.944	0.886	1.30288e-06	Igf2+	EPCAM
6.99807e-11	0.314201	0.983	0.956	1.31823e-06	Igf2+	FCGRT
3.56194e-10	0.392157	0.724	0.606	6.70963e-06	Igf2+	FABP5
7.64322e-10	0.252209	0.905	0.857	1.43975e-05	Igf2+	LRPAP1
1.0111e-09	0.269533	0.513	0.352	1.90462e-05	Igf2+	PSTPIP1
1.29575e-09	0.350949	0.983	0.943	2.44081e-05	Igf2+	ITM2B
2.21524e-09	0.256203	0.918	0.877	4.17284e-05	Igf2+	CD74
3.92902e-08	0.259074	0.422	0.285	0.000740109	Igf2+	SMIM22
5.86222e-08	0.306048	0.591	0.443	0.00110427	Igf2+	SOX4
5.98948e-08	0.72502	0.957	0.93	0.00112824	Igf2+	MT2A
7.14381e-07	0.272858	0.94	0.89	0.0134568	Igf2+	PRDX4
6.73134e-06	0.386889	0.966	0.93	0.126798	Igf2+	MT1F
9.00601e-06	0.515957	0.901	0.833	0.169646	Igf2+	MT1E
9.58825e-06	0.28298	0.845	0.79	0.180614	Igf2+	LGALS3BP
1.46363e-05	0.52728	0.957	0.948	0.275703	Igf2+	MT1X
3.34433e-05	0.848008	0.935	0.891	0.629971	Igf2+	MT1G
0.000220794	0.374644	0.138	0.075	1	Igf2+	PPY
0.00857384	0.358975	0.647	0.621	1	Igf2+	PEG10

## Sheet: Immature (FEV+) seBC
p_val	avg_logFC	pct.1	pct.2	p_val_adj	cluster	gene
2.2821e-187	0.929768	0.662	0.194	4.29879e-183	Immature (FEV+)	TPH1
5.61768e-176	1.01807	0.89	0.48	1.0582e-171	Immature (FEV+)	FEV
2.7986e-130	0.462638	0.48	0.124	5.27173e-126	Immature (FEV+)	COL5A2
8.76036e-122	0.335165	1	1	1.65019e-117	Immature (FEV+)	MT-CO2
2.33303e-111	0.493726	0.64	0.251	4.39472e-107	Immature (FEV+)	CBLN1
4.59619e-100	0.659714	0.866	0.488	8.65784e-96	Immature (FEV+)	IGFBP5
7.71538e-95	0.54469	0.683	0.313	1.45335e-90	Immature (FEV+)	OVOS2
2.42949e-94	0.465115	0.796	0.424	4.57643e-90	Immature (FEV+)	DDC
3.68432e-91	0.828594	0.427	0.13	6.94016e-87	Immature (FEV+)	STC1
2.32819e-89	0.314597	0.745	0.351	4.38561e-85	Immature (FEV+)	EVL
5.59169e-86	0.371836	0.821	0.464	1.05331e-81	Immature (FEV+)	SYT13
2.76687e-80	0.295661	0.961	0.773	5.21194e-76	Immature (FEV+)	CD81
3.83728e-80	0.251942	1	1	7.22829e-76	Immature (FEV+)	MT-ND4
4.04235e-79	0.597092	1	0.999	7.61458e-75	Immature (FEV+)	CRYBA2
7.8144e-76	0.339877	0.723	0.36	1.472e-71	Immature (FEV+)	ID3
1.56376e-74	0.392661	0.939	0.72	2.94565e-70	Immature (FEV+)	C1QL1
3.77259e-72	0.31751	0.951	0.714	7.10643e-68	Immature (FEV+)	INSM1
1.05207e-68	0.258748	0.999	0.973	1.98178e-64	Immature (FEV+)	TMSB4X
7.83746e-62	0.250094	0.927	0.681	1.47634e-57	Immature (FEV+)	GNAI2
5.2178e-52	0.283714	0.755	0.43	9.82876e-48	Immature (FEV+)	MESP1

## Sheet: Mature (INS+, IAPP+) seBC
p_val	avg_logFC	pct.1	pct.2	p_val_adj	cluster	gene
6.99441e-222	0.721464	1	1	1.31754e-217	Mature (INS+, IAPP+)	INS
9.17134e-171	0.654044	0.819	0.493	1.7276e-166	Mature (INS+, IAPP+)	CHRNA3
2.39197e-167	0.604177	0.979	0.888	4.50576e-163	Mature (INS+, IAPP+)	ERO1B
8.97058e-159	0.556869	0.974	0.783	1.68979e-154	Mature (INS+, IAPP+)	ACVR1C
3.95307e-154	0.492705	0.992	0.934	7.44639e-150	Mature (INS+, IAPP+)	SLC30A8
3.09972e-132	0.49256	1	1	5.83894e-128	Mature (INS+, IAPP+)	MALAT1
1.23176e-130	0.508859	0.771	0.501	2.32026e-126	Mature (INS+, IAPP+)	LMO1
3.26507e-127	0.489091	0.997	0.988	6.15042e-123	Mature (INS+, IAPP+)	CD24
1.15954e-122	0.521851	0.916	0.788	2.18423e-118	Mature (INS+, IAPP+)	SVIP
3.30536e-122	0.614327	0.88	0.764	6.22632e-118	Mature (INS+, IAPP+)	KCNK16
4.00548e-122	0.527	0.862	0.649	7.54513e-118	Mature (INS+, IAPP+)	PCDH7
2.88564e-116	0.968228	0.748	0.524	5.43567e-112	Mature (INS+, IAPP+)	NEFM
1.4885e-115	0.817613	0.99	0.945	2.80389e-111	Mature (INS+, IAPP+)	PCP4
7.18962e-108	0.466729	0.717	0.48	1.35431e-103	Mature (INS+, IAPP+)	SAMSN1
7.13074e-104	0.403504	0.839	0.622	1.34322e-99	Mature (INS+, IAPP+)	VLDLR
5.51553e-90	0.371565	0.574	0.333	1.03896e-85	Mature (INS+, IAPP+)	SUSD4
6.60703e-90	0.416967	0.619	0.362	1.24457e-85	Mature (INS+, IAPP+)	HOPX
2.5207e-88	0.501293	0.847	0.673	4.74825e-84	Mature (INS+, IAPP+)	SMIM5
3.58856e-84	0.365058	0.804	0.619	6.75978e-80	Mature (INS+, IAPP+)	CACNA2D1
3.08584e-81	0.398987	0.876	0.72	5.8128e-77	Mature (INS+, IAPP+)	SMIM6
1.91262e-80	0.420258	0.9	0.791	3.60281e-76	Mature (INS+, IAPP+)	PKIB
5.43659e-79	0.526553	0.903	0.806	1.02409e-74	Mature (INS+, IAPP+)	STMN2
1.99139e-78	0.351916	0.57	0.341	3.75117e-74	Mature (INS+, IAPP+)	GRIA4
4.75312e-77	0.335385	0.504	0.27	8.95345e-73	Mature (INS+, IAPP+)	SLC17A6
1.67867e-74	0.328642	0.942	0.881	3.16211e-70	Mature (INS+, IAPP+)	SURF4
2.80197e-72	0.336876	0.899	0.824	5.27806e-68	Mature (INS+, IAPP+)	TPD52
2.64607e-70	0.425794	0.679	0.504	4.98439e-66	Mature (INS+, IAPP+)	IGSF1
7.212e-70	1.54554	0.98	0.958	1.35852e-65	Mature (INS+, IAPP+)	IAPP
2.2514e-69	0.33679	0.963	0.934	4.24097e-65	Mature (INS+, IAPP+)	RTN4
4.33493e-69	0.467883	0.706	0.542	8.16571e-65	Mature (INS+, IAPP+)	KCNK17
3.98066e-66	0.367176	0.703	0.545	7.49838e-62	Mature (INS+, IAPP+)	ABLIM1
5.92661e-65	0.287567	1	0.998	1.1164e-60	Mature (INS+, IAPP+)	CD99
7.74162e-65	0.748629	0.753	0.624	1.45829e-60	Mature (INS+, IAPP+)	CALB2
2.41686e-64	0.547272	0.776	0.607	4.55265e-60	Mature (INS+, IAPP+)	CHODL
7.0592e-63	0.303411	0.986	0.958	1.32974e-58	Mature (INS+, IAPP+)	SELM
1.28666e-62	0.365467	0.719	0.59	2.42367e-58	Mature (INS+, IAPP+)	RAP1B
3.62912e-62	0.300365	0.531	0.34	6.83617e-58	Mature (INS+, IAPP+)	TMEM196
4.22596e-59	0.539284	0.476	0.285	7.96044e-55	Mature (INS+, IAPP+)	egfp
5.43713e-59	0.260147	0.943	0.91	1.02419e-54	Mature (INS+, IAPP+)	NDUFA5
9.01253e-59	0.363432	0.68	0.516	1.69769e-54	Mature (INS+, IAPP+)	CXCL12
1.12027e-57	0.443218	0.845	0.734	2.11025e-53	Mature (INS+, IAPP+)	C1QL1
2.5446e-56	0.399672	0.983	0.983	4.79326e-52	Mature (INS+, IAPP+)	SCGN
1.00407e-55	0.38864	0.875	0.82	1.89137e-51	Mature (INS+, IAPP+)	UROS
1.72445e-55	0.310768	0.754	0.605	3.24834e-51	Mature (INS+, IAPP+)	ONECUT2
2.77023e-55	0.317768	0.834	0.725	5.21829e-51	Mature (INS+, IAPP+)	MAP1B
6.27105e-55	0.323669	0.657	0.488	1.18128e-50	Mature (INS+, IAPP+)	PAM
4.09148e-53	0.285287	0.982	0.946	7.70712e-49	Mature (INS+, IAPP+)	SCG3
1.75522e-52	0.272432	0.988	0.98	3.30631e-48	Mature (INS+, IAPP+)	TAGLN2
8.48403e-51	0.322846	0.769	0.681	1.59814e-46	Mature (INS+, IAPP+)	APLP1
1.00492e-49	0.251813	0.434	0.257	1.89296e-45	Mature (INS+, IAPP+)	ROBO2
1.35455e-49	0.359875	0.646	0.515	2.55156e-45	Mature (INS+, IAPP+)	HPCA
3.75858e-48	0.28539	0.701	0.6	7.08003e-44	Mature (INS+, IAPP+)	SEPT11
3.56364e-46	0.337059	0.709	0.589	6.71283e-42	Mature (INS+, IAPP+)	ENPP2
1.57072e-44	0.413606	0.746	0.674	2.95876e-40	Mature (INS+, IAPP+)	MLLT11
3.58054e-44	0.262747	0.937	0.899	6.74466e-40	Mature (INS+, IAPP+)	PFN2
2.68749e-43	0.281444	0.815	0.724	5.06243e-39	Mature (INS+, IAPP+)	NR3C1
7.69438e-42	0.328669	0.52	0.363	1.44939e-37	Mature (INS+, IAPP+)	PCSK1
9.40033e-40	0.320455	0.585	0.439	1.77074e-35	Mature (INS+, IAPP+)	RAMP1
1.64532e-39	0.319013	0.399	0.247	3.09929e-35	Mature (INS+, IAPP+)	CXCR4
1.88735e-39	0.290804	0.979	0.963	3.5552e-35	Mature (INS+, IAPP+)	C1orf122
4.34337e-39	0.751894	0.824	0.758	8.18161e-35	Mature (INS+, IAPP+)	DLK1
5.05933e-39	0.307596	0.758	0.661	9.53025e-35	Mature (INS+, IAPP+)	NLRP1
8.36127e-39	0.31924	0.925	0.92	1.57501e-34	Mature (INS+, IAPP+)	SERINC2
1.25228e-37	0.386925	0.941	0.909	2.35891e-33	Mature (INS+, IAPP+)	CALY
3.02745e-37	0.251409	0.606	0.473	5.7028e-33	Mature (INS+, IAPP+)	PDX1
7.57279e-37	0.362538	0.416	0.271	1.42649e-32	Mature (INS+, IAPP+)	ERMN
1.31224e-36	0.270443	0.661	0.554	2.47187e-32	Mature (INS+, IAPP+)	TSPAN2
1.73625e-35	0.271706	0.582	0.47	3.27057e-31	Mature (INS+, IAPP+)	PLPPR5
4.60199e-35	0.282013	0.793	0.709	8.66877e-31	Mature (INS+, IAPP+)	HN1
8.49862e-35	0.253009	0.999	0.999	1.60089e-30	Mature (INS+, IAPP+)	IFI6
2.75118e-34	0.267108	0.738	0.643	5.18239e-30	Mature (INS+, IAPP+)	ASCL2
6.14243e-34	0.336758	0.494	0.355	1.15705e-29	Mature (INS+, IAPP+)	LINC00643
1.72846e-33	0.294215	0.655	0.563	3.25591e-29	Mature (INS+, IAPP+)	TMOD1
4.88834e-33	0.343472	0.916	0.84	9.20816e-29	Mature (INS+, IAPP+)	MIR7-3HG
8.2137e-33	0.516618	0.847	0.826	1.54721e-28	Mature (INS+, IAPP+)	MAL2
1.0327e-31	0.275887	0.592	0.49	1.94531e-27	Mature (INS+, IAPP+)	HIST1H2AC
4.07679e-30	0.265786	0.746	0.641	7.67945e-26	Mature (INS+, IAPP+)	BASP1
1.31858e-28	0.560692	0.353	0.231	2.48381e-24	Mature (INS+, IAPP+)	NEFL
3.65279e-27	0.336346	0.509	0.411	6.88077e-23	Mature (INS+, IAPP+)	TLE4
4.48671e-27	0.324526	0.833	0.777	8.45162e-23	Mature (INS+, IAPP+)	TUBA1A
3.61676e-26	0.282318	0.571	0.489	6.81289e-22	Mature (INS+, IAPP+)	FXYD6
1.00027e-25	0.33235	0.644	0.588	1.8842e-21	Mature (INS+, IAPP+)	GCA
4.78698e-24	0.256583	0.679	0.624	9.01723e-20	Mature (INS+, IAPP+)	TMEM59L
4.62909e-23	0.285411	0.424	0.327	8.71982e-19	Mature (INS+, IAPP+)	PSTPIP1
1.19817e-18	0.330314	0.352	0.261	2.25699e-14	Mature (INS+, IAPP+)	DRAIC
4.56185e-17	0.721291	0.964	0.955	8.59315e-13	Mature (INS+, IAPP+)	GAST
2.20201e-15	0.354196	0.615	0.555	4.14792e-11	Mature (INS+, IAPP+)	BTBD17
3.86478e-14	0.307714	0.722	0.687	7.28009e-10	Mature (INS+, IAPP+)	CDKN1C
6.65172e-14	0.281256	0.129	0.235	1.25299e-09	Mature (INS+, IAPP+)	SPON2
0.000798178	0.290212	0.662	0.715	1	Mature (INS+, IAPP+)	AQP3
0.00858164	0.270459	0.079	0.059	1	Mature (INS+, IAPP+)	FAM159B
0.0168347	0.264139	0.427	0.5	1	Mature (INS+, IAPP+)	GAL

## Sheet: GCG seBC
p_val	avg_logFC	pct.1	pct.2	p_val_adj	cluster	gene
0	1.26788	1	1	0	Polyhormonal (GCG+)	TTR
1.22001e-261	1.13363	0.998	0.942	2.29813e-257	Polyhormonal (GCG+)	SERPINA1
3.41624e-231	1.04388	0.857	0.496	6.43517e-227	Polyhormonal (GCG+)	SERPINI1
4.07081e-222	0.799106	0.915	0.581	7.66819e-218	Polyhormonal (GCG+)	NBL1
3.03371e-216	1.49203	0.995	0.993	5.7146e-212	Polyhormonal (GCG+)	APOA1
1.38255e-203	2.07173	1	1	2.60431e-199	Polyhormonal (GCG+)	GCG
2.67755e-203	0.878668	0.999	0.976	5.04371e-199	Polyhormonal (GCG+)	CLU
1.28695e-200	0.549572	0.7	0.255	2.42424e-196	Polyhormonal (GCG+)	ARX
1.87142e-198	0.816634	0.999	0.99	3.52519e-194	Polyhormonal (GCG+)	APOC3
1.2563e-165	0.611703	0.906	0.707	2.36648e-161	Polyhormonal (GCG+)	SEPP1
8.16859e-164	0.543002	0.981	0.897	1.53872e-159	Polyhormonal (GCG+)	CAPZB
3.57945e-153	0.542244	0.957	0.829	6.74261e-149	Polyhormonal (GCG+)	TMEM14A
3.52849e-152	0.725577	0.982	0.929	6.64662e-148	Polyhormonal (GCG+)	APOC1
3.08793e-151	1.29921	0.765	0.484	5.81674e-147	Polyhormonal (GCG+)	GSTA1
3.21665e-149	0.520694	0.988	0.925	6.05921e-145	Polyhormonal (GCG+)	SEC11C
1.6831e-130	0.626564	0.832	0.554	3.17046e-126	Polyhormonal (GCG+)	SPTSSB
2.61243e-129	0.6044	0.795	0.538	4.92104e-125	Polyhormonal (GCG+)	SERPINF2
8.68369e-120	0.458857	0.931	0.771	1.63575e-115	Polyhormonal (GCG+)	SMCO4
2.03002e-119	1.20911	0.8	0.596	3.82396e-115	Polyhormonal (GCG+)	CRH
2.14234e-113	0.618151	0.995	0.982	4.03553e-109	Polyhormonal (GCG+)	APOE
5.63506e-109	0.608615	0.774	0.514	1.06148e-104	Polyhormonal (GCG+)	ITIH1
1.28317e-104	0.423127	0.823	0.585	2.41711e-100	Polyhormonal (GCG+)	C5orf38
1.69976e-97	0.510583	0.952	0.867	3.20185e-93	Polyhormonal (GCG+)	HLA-B
4.98444e-96	0.815936	0.898	0.802	9.38918e-92	Polyhormonal (GCG+)	SPINK1
3.74334e-91	0.631577	0.676	0.432	7.05133e-87	Polyhormonal (GCG+)	VSTM2A
9.89114e-88	0.557918	0.892	0.786	1.86319e-83	Polyhormonal (GCG+)	GLUL
8.90345e-84	0.528912	0.856	0.722	1.67714e-79	Polyhormonal (GCG+)	CTSZ
7.05998e-83	0.615354	0.665	0.436	1.32989e-78	Polyhormonal (GCG+)	DPP4
3.28822e-80	0.375232	0.951	0.848	6.19402e-76	Polyhormonal (GCG+)	SLC7A2
1.55026e-77	0.345957	0.458	0.203	2.92022e-73	Polyhormonal (GCG+)	APCDD1
7.24754e-77	0.290604	1	0.997	1.36522e-72	Polyhormonal (GCG+)	BEX1
2.41726e-74	0.403235	0.99	0.975	4.55339e-70	Polyhormonal (GCG+)	BTG1
1.56057e-73	0.80532	0.955	0.909	2.93964e-69	Polyhormonal (GCG+)	AMBP
2.15791e-71	0.492607	0.922	0.89	4.06485e-67	Polyhormonal (GCG+)	F10
1.0519e-70	0.401345	0.924	0.865	1.98146e-66	Polyhormonal (GCG+)	CD74
1.59969e-70	0.368123	0.726	0.515	3.01333e-66	Polyhormonal (GCG+)	RPS6KA3
5.45319e-70	0.407928	0.921	0.827	1.02722e-65	Polyhormonal (GCG+)	HEPACAM2
5.4699e-67	0.346803	0.993	0.952	1.03036e-62	Polyhormonal (GCG+)	SAT1
5.24874e-66	0.3612	0.847	0.729	9.88705e-62	Polyhormonal (GCG+)	HLA-C
3.37547e-64	0.528147	0.976	0.944	6.35837e-60	Polyhormonal (GCG+)	AGT
5.26041e-63	0.250275	0.996	0.992	9.90903e-59	Polyhormonal (GCG+)	NPC2
1.92907e-61	0.435453	0.79	0.627	3.6338e-57	Polyhormonal (GCG+)	LBH
7.48952e-59	0.348159	0.986	0.971	1.4108e-54	Polyhormonal (GCG+)	HLA-A
8.50323e-59	0.318255	0.808	0.643	1.60175e-54	Polyhormonal (GCG+)	PLAC8
5.45468e-57	0.390371	0.84	0.672	1.0275e-52	Polyhormonal (GCG+)	AC009014.3
5.91153e-57	0.303888	0.502	0.293	1.11355e-52	Polyhormonal (GCG+)	SDC2
3.36606e-56	0.337036	0.288	0.102	6.34064e-52	Polyhormonal (GCG+)	GSTA2
1.61107e-55	0.333727	0.891	0.83	3.03477e-51	Polyhormonal (GCG+)	GSTA4
2.36547e-54	0.4482	0.724	0.572	4.45584e-50	Polyhormonal (GCG+)	APOM
2.72521e-54	0.306168	0.859	0.73	5.13347e-50	Polyhormonal (GCG+)	IMPA2
3.60162e-54	0.37493	0.907	0.836	6.78437e-50	Polyhormonal (GCG+)	PEMT
4.68703e-54	0.290958	0.968	0.938	8.82896e-50	Polyhormonal (GCG+)	ITM2B
7.53107e-54	0.391498	0.698	0.545	1.41863e-49	Polyhormonal (GCG+)	PCSK2
3.54892e-53	0.371713	0.5	0.291	6.6851e-49	Polyhormonal (GCG+)	VIM
4.3069e-53	0.261987	0.452	0.248	8.11291e-49	Polyhormonal (GCG+)	SPON1
2.75933e-52	0.316406	0.886	0.798	5.19776e-48	Polyhormonal (GCG+)	ITGB1
3.54013e-52	0.280656	0.282	0.105	6.66855e-48	Polyhormonal (GCG+)	SERPIND1
4.82485e-51	0.434641	0.81	0.728	9.08857e-47	Polyhormonal (GCG+)	EPHX1
5.02463e-51	0.381385	0.804	0.691	9.46489e-47	Polyhormonal (GCG+)	ALDH1A1
1.77933e-50	0.264051	0.994	0.994	3.35172e-46	Polyhormonal (GCG+)	CD63
2.19549e-50	0.255117	0.963	0.942	4.13564e-46	Polyhormonal (GCG+)	CTSD
4.67535e-49	0.304725	0.92	0.883	8.80696e-45	Polyhormonal (GCG+)	PRDX4
2.44635e-46	0.285851	0.755	0.595	4.60818e-42	Polyhormonal (GCG+)	TNFRSF21
5.58705e-46	0.293938	0.778	0.672	1.05243e-41	Polyhormonal (GCG+)	ALCAM
1.26438e-45	0.294974	0.461	0.284	2.38171e-41	Polyhormonal (GCG+)	F2
5.15624e-45	0.342547	0.965	0.924	9.71282e-41	Polyhormonal (GCG+)	ASPH
1.77156e-44	0.288567	0.519	0.343	3.33708e-40	Polyhormonal (GCG+)	ARRDC4
2.22714e-44	0.425328	0.568	0.404	4.19526e-40	Polyhormonal (GCG+)	SMC2
1.64335e-43	0.303697	0.544	0.375	3.09557e-39	Polyhormonal (GCG+)	SLC22A18
5.81597e-43	1.10678	0.789	0.728	1.09555e-38	Polyhormonal (GCG+)	APOA2
1.07378e-40	0.334874	0.522	0.348	2.02267e-36	Polyhormonal (GCG+)	TM4SF5
4.00426e-39	0.361357	0.531	0.376	7.54283e-35	Polyhormonal (GCG+)	TNFSF10
1.18041e-38	0.284606	0.79	0.656	2.22355e-34	Polyhormonal (GCG+)	ARFGEF3
1.59914e-38	0.469586	0.704	0.619	3.01231e-34	Polyhormonal (GCG+)	VTN
1.58268e-36	0.257417	0.471	0.32	2.9813e-32	Polyhormonal (GCG+)	ACSS3
7.72218e-35	0.25102	0.716	0.603	1.45463e-30	Polyhormonal (GCG+)	CIDEB
3.00461e-33	0.319998	0.676	0.565	5.65979e-29	Polyhormonal (GCG+)	SCG2
5.09723e-33	0.25468	0.999	0.998	9.60165e-29	Polyhormonal (GCG+)	B2M
1.39369e-32	0.255106	0.95	0.913	2.62529e-28	Polyhormonal (GCG+)	CPE
3.10289e-32	0.261678	0.783	0.709	5.84491e-28	Polyhormonal (GCG+)	RRBP1
2.94145e-31	0.619116	0.381	0.239	5.54081e-27	Polyhormonal (GCG+)	GC
5.32652e-31	0.49677	0.512	0.37	1.00336e-26	Polyhormonal (GCG+)	CYP1A1
2.08829e-30	0.256479	0.657	0.552	3.93371e-26	Polyhormonal (GCG+)	GLS
1.45986e-27	0.358626	0.281	0.148	2.74994e-23	Polyhormonal (GCG+)	MGST1
1.23586e-25	0.319361	0.637	0.55	2.32799e-21	Polyhormonal (GCG+)	HMGB3
7.15143e-25	1.03052	0.496	0.389	1.34712e-20	Polyhormonal (GCG+)	PYY
1.39079e-22	0.252057	0.635	0.563	2.61983e-18	Polyhormonal (GCG+)	LIPC
1.34658e-20	0.297059	0.297	0.185	2.53656e-16	Polyhormonal (GCG+)	CLDN18
2.84562e-15	0.278887	1	1	5.36029e-11	Polyhormonal (GCG+)	CHGA
5.23716e-15	0.452804	0.465	0.407	9.86524e-11	Polyhormonal (GCG+)	TMEM176A
2.09043e-13	0.347032	0.441	0.381	3.93774e-09	Polyhormonal (GCG+)	TMEM176B
7.8245e-13	0.25145	0.362	0.28	1.4739e-08	Polyhormonal (GCG+)	TM4SF4
6.25883e-10	0.308242	0.245	0.175	1.17898e-05	Polyhormonal (GCG+)	HES1
1.7505e-09	0.282938	0.853	0.832	3.29742e-05	Polyhormonal (GCG+)	MT1E
3.43551e-08	0.251576	0.13	0.079	0.000647146	Polyhormonal (GCG+)	MT1B
7.4334e-06	0.386059	0.943	0.95	0.140023	Polyhormonal (GCG+)	MT1X
0.000238389	0.400194	0.884	0.896	1	Polyhormonal (GCG+)	MT1G
0.0159321	0.251861	0.924	0.935	1	Polyhormonal (GCG+)	MT2A
0.0274581	0.33057	0.092	0.073	1	Polyhormonal (GCG+)	PPY

## Sheet: SST seBC
p_val	avg_logFC	pct.1	pct.2	p_val_adj	cluster	gene
1.01815e-241	1.05088	0.821	0.112	1.91789e-237	Polyhormonal (SST+)	HHEX
1.63534e-145	2.99169	1	1	3.08049e-141	Polyhormonal (SST+)	SST
2.19297e-43	0.519679	0.943	0.7	4.13089e-39	Polyhormonal (SST+)	AC009014.3
2.4878e-41	0.275827	0.403	0.125	4.68627e-37	Polyhormonal (SST+)	ST3GAL1
1.85865e-27	0.34969	0.696	0.427	3.50115e-23	Polyhormonal (SST+)	ETV1
7.86246e-25	0.369335	0.981	0.938	1.48105e-20	Polyhormonal (SST+)	SEC11C
2.90692e-24	0.262351	0.403	0.171	5.47577e-20	Polyhormonal (SST+)	LEPR
2.39415e-22	0.276598	0.27	0.092	4.50985e-18	Polyhormonal (SST+)	DAPL1
3.11278e-21	0.278598	0.529	0.287	5.86354e-17	Polyhormonal (SST+)	LY6H
6.02258e-20	0.283254	0.882	0.677	1.13447e-15	Polyhormonal (SST+)	ARFGEF3
1.3804e-19	0.400908	0.783	0.571	2.60025e-15	Polyhormonal (SST+)	ID1
6.15755e-14	0.275943	0.631	0.435	1.1599e-09	Polyhormonal (SST+)	ID3
1.61983e-10	0.352756	0.996	0.985	3.05127e-06	Polyhormonal (SST+)	APOE
6.09095e-09	0.268509	0.456	0.313	0.000114735	Polyhormonal (SST+)	ASCL1
2.31213e-08	0.539356	0.426	0.307	0.000435535	Polyhormonal (SST+)	MLN

## Sheet: MKI67+ seBC
p_val	avg_logFC	pct.1	pct.2	p_val_adj	cluster	gene
0	0.973056	0.889	0.021	0	Proliferating (MKI67+)	MKI67
0	0.882751	0.825	0.014	0	Proliferating (MKI67+)	PBK
0	0.741528	0.746	0.009	0	Proliferating (MKI67+)	CENPA
0	0.431708	0.492	0.003	0	Proliferating (MKI67+)	CDKN2C
0	0.415154	0.556	0.004	0	Proliferating (MKI67+)	CKAP2L
1.37632e-304	0.942731	0.889	0.022	2.59257e-300	Proliferating (MKI67+)	NUSAP1
2.1798e-292	1.22922	0.905	0.026	4.10609e-288	Proliferating (MKI67+)	TOP2A
8.9122e-284	0.700975	0.651	0.011	1.67879e-279	Proliferating (MKI67+)	NUF2
1.60622e-279	0.63685	0.762	0.017	3.02563e-275	Proliferating (MKI67+)	GTSE1
1.30323e-273	0.72675	0.81	0.021	2.4549e-269	Proliferating (MKI67+)	RAD51AP1
1.22558e-272	1.21485	0.889	0.027	2.30863e-268	Proliferating (MKI67+)	RRM2
1.48315e-265	0.762594	0.825	0.023	2.7938e-261	Proliferating (MKI67+)	PRC1
6.39462e-263	0.528804	0.635	0.011	1.20455e-258	Proliferating (MKI67+)	SGOL1
3.00175e-253	0.4764	0.587	0.01	5.65439e-249	Proliferating (MKI67+)	ASPM
1.3891e-247	1.03246	0.762	0.021	2.61665e-243	Proliferating (MKI67+)	CDK1
8.79234e-247	1.20528	0.81	0.024	1.65621e-242	Proliferating (MKI67+)	CENPF
1.10191e-246	0.732548	0.683	0.015	2.07566e-242	Proliferating (MKI67+)	TPX2
1.82009e-240	0.770696	0.746	0.021	3.42851e-236	Proliferating (MKI67+)	ASF1B
4.32419e-239	0.983538	0.778	0.023	8.14548e-235	Proliferating (MKI67+)	AURKB
2.44033e-234	0.645343	0.571	0.01	4.59684e-230	Proliferating (MKI67+)	HMMR
1.98442e-228	1.35449	0.968	0.044	3.73805e-224	Proliferating (MKI67+)	BIRC5
1.05279e-226	0.588836	0.714	0.02	1.98315e-222	Proliferating (MKI67+)	FOXM1
9.81996e-223	0.463224	0.476	0.007	1.84979e-218	Proliferating (MKI67+)	DEPDC1
1.45917e-222	1.00971	0.73	0.022	2.74864e-218	Proliferating (MKI67+)	SPC25
2.12583e-218	0.569505	0.651	0.017	4.00443e-214	Proliferating (MKI67+)	CDCA8
2.15649e-217	0.791947	0.762	0.025	4.06218e-213	Proliferating (MKI67+)	MXD3
6.10921e-215	0.380334	0.46	0.006	1.15079e-210	Proliferating (MKI67+)	KIF2C
5.13265e-212	0.375031	0.444	0.006	9.66838e-208	Proliferating (MKI67+)	NDC80
1.01742e-203	0.428092	0.46	0.007	1.91652e-199	Proliferating (MKI67+)	NEK2
4.19549e-199	0.796097	0.73	0.026	7.90304e-195	Proliferating (MKI67+)	TK1
4.34502e-198	0.367906	0.524	0.011	8.18471e-194	Proliferating (MKI67+)	FAM64A
1.8279e-197	0.63517	0.603	0.016	3.44321e-193	Proliferating (MKI67+)	CCNA2
4.59127e-196	0.528936	0.492	0.009	8.64858e-192	Proliferating (MKI67+)	CENPE
2.0513e-188	0.679192	0.698	0.025	3.86404e-184	Proliferating (MKI67+)	TROAP
1.09177e-185	0.721646	0.651	0.021	2.05656e-181	Proliferating (MKI67+)	CDCA3
5.10986e-184	1.14919	0.905	0.049	9.62545e-180	Proliferating (MKI67+)	MAD2L1
2.04583e-181	0.369051	0.46	0.009	3.85373e-177	Proliferating (MKI67+)	OIP5
2.16929e-179	0.259884	0.381	0.005	4.0863e-175	Proliferating (MKI67+)	CEP55
9.01506e-178	0.371891	0.46	0.009	1.69817e-173	Proliferating (MKI67+)	TCF19
9.41674e-178	0.873999	0.651	0.023	1.77383e-173	Proliferating (MKI67+)	CCNB2
1.27689e-175	0.44309	0.556	0.015	2.40528e-171	Proliferating (MKI67+)	MND1
4.48832e-173	0.343455	0.46	0.01	8.45464e-169	Proliferating (MKI67+)	ARHGAP11A
6.50005e-168	0.250064	0.333	0.004	1.22442e-163	Proliferating (MKI67+)	NCAPH
2.33911e-163	1.88224	0.952	0.067	4.40618e-159	Proliferating (MKI67+)	UBE2C
7.83367e-163	0.777121	0.762	0.038	1.47563e-158	Proliferating (MKI67+)	CENPM
1.84293e-151	0.382794	0.429	0.01	3.47153e-147	Proliferating (MKI67+)	KIFC1
5.53834e-151	0.45195	0.603	0.023	1.04326e-146	Proliferating (MKI67+)	CENPU
1.36341e-150	0.275668	0.333	0.005	2.56826e-146	Proliferating (MKI67+)	FAM111B
1.12682e-145	0.505172	0.524	0.017	2.12259e-141	Proliferating (MKI67+)	CDCA5
2.70738e-145	0.357689	0.444	0.012	5.09989e-141	Proliferating (MKI67+)	DLGAP5
1.9494e-143	1.15724	1	0.088	3.67208e-139	Proliferating (MKI67+)	CDKN3
5.6316e-141	0.268874	0.381	0.008	1.06082e-136	Proliferating (MKI67+)	SKA1
8.72062e-139	0.518922	0.587	0.024	1.6427e-134	Proliferating (MKI67+)	KIF20B
1.37436e-135	1.07246	0.905	0.073	2.58888e-131	Proliferating (MKI67+)	CENPW
7.07668e-132	0.269824	0.413	0.011	1.33303e-127	Proliferating (MKI67+)	PARPBP
5.68291e-129	0.505231	0.603	0.029	1.07049e-124	Proliferating (MKI67+)	CENPK
1.95334e-127	0.971897	0.794	0.057	3.6795e-123	Proliferating (MKI67+)	ZWINT
2.78873e-120	0.650672	0.508	0.021	5.25313e-116	Proliferating (MKI67+)	CDC20
6.07475e-119	0.480928	0.635	0.036	1.1443e-114	Proliferating (MKI67+)	CENPH
1.25084e-118	0.281143	0.317	0.007	2.35621e-114	Proliferating (MKI67+)	CASC5
3.44603e-118	0.299901	0.333	0.008	6.4913e-114	Proliferating (MKI67+)	PRR11
8.46123e-117	0.396494	0.571	0.028	1.59384e-112	Proliferating (MKI67+)	ECT2
2.55915e-112	0.708649	0.571	0.03	4.82068e-108	Proliferating (MKI67+)	PLK1
3.68564e-112	1.66303	1	0.123	6.94264e-108	Proliferating (MKI67+)	KIAA0101
8.98767e-109	0.50211	0.492	0.022	1.69301e-104	Proliferating (MKI67+)	SGOL2
3.11811e-108	0.699587	0.825	0.073	5.87358e-104	Proliferating (MKI67+)	CENPN
4.64203e-108	0.741063	0.651	0.043	8.74419e-104	Proliferating (MKI67+)	AURKA
5.97608e-108	0.338869	0.444	0.018	1.12571e-103	Proliferating (MKI67+)	RTKN2
2.94718e-102	0.354621	0.429	0.017	5.5516e-98	Proliferating (MKI67+)	ATAD2
1.36551e-99	0.283846	0.397	0.015	2.57222e-95	Proliferating (MKI67+)	ARHGEF39
3.88655e-99	0.396202	0.476	0.023	7.32109e-95	Proliferating (MKI67+)	POC1A
3.93042e-99	0.318898	0.397	0.015	7.40373e-95	Proliferating (MKI67+)	PKMYT1
1.38523e-95	1.05431	0.587	0.039	2.60937e-91	Proliferating (MKI67+)	CCNB1
1.35414e-91	0.371546	0.556	0.036	2.5508e-87	Proliferating (MKI67+)	TACC3
3.856e-88	0.3115	0.413	0.019	7.26355e-84	Proliferating (MKI67+)	GPSM2
4.5784e-85	1.94681	0.952	0.15	8.62433e-81	Proliferating (MKI67+)	PTTG1
7.75634e-80	0.832217	0.825	0.106	1.46106e-75	Proliferating (MKI67+)	CCDC34
9.57628e-80	0.592841	0.762	0.084	1.80388e-75	Proliferating (MKI67+)	NUDT1
5.24616e-79	1.5714	0.952	0.163	9.88218e-75	Proliferating (MKI67+)	HMGB2
9.51191e-72	0.315264	0.317	0.014	1.79176e-67	Proliferating (MKI67+)	BRCA2
1.95876e-69	0.318565	0.413	0.026	3.68971e-65	Proliferating (MKI67+)	FAM111A
2.84327e-68	1.10356	0.873	0.154	5.35587e-64	Proliferating (MKI67+)	UBE2T
3.55952e-68	0.691304	0.81	0.117	6.70506e-64	Proliferating (MKI67+)	PHF19
2.9559e-66	0.747998	0.778	0.107	5.56804e-62	Proliferating (MKI67+)	TMSB15A
3.91161e-66	0.503342	0.619	0.065	7.36829e-62	Proliferating (MKI67+)	GINS2
9.48333e-65	0.903216	0.825	0.139	1.78637e-60	Proliferating (MKI67+)	SMC4
2.96071e-64	0.365099	0.492	0.041	5.57709e-60	Proliferating (MKI67+)	RFC3
2.9818e-63	0.274517	0.397	0.026	5.61681e-59	Proliferating (MKI67+)	ORC6
4.36958e-58	0.485812	0.492	0.046	8.23098e-54	Proliferating (MKI67+)	TYMS
5.82531e-57	0.609737	0.587	0.07	1.09731e-52	Proliferating (MKI67+)	KNSTRN
6.46223e-56	1.55992	0.968	0.287	1.21729e-51	Proliferating (MKI67+)	CKS2
2.0481e-54	0.323439	0.413	0.034	3.85801e-50	Proliferating (MKI67+)	E2F1
2.31294e-53	0.39206	0.54	0.061	4.35689e-49	Proliferating (MKI67+)	RACGAP1
4.87442e-49	0.71404	0.635	0.097	9.18194e-45	Proliferating (MKI67+)	RNASEH2A
2.21648e-48	0.460426	0.476	0.052	4.17519e-44	Proliferating (MKI67+)	FEN1
8.8647e-48	0.307534	0.444	0.045	1.66984e-43	Proliferating (MKI67+)	VRK1
2.38987e-47	0.274849	0.27	0.016	4.5018e-43	Proliferating (MKI67+)	BRCA1
8.39543e-45	0.779469	0.889	0.244	1.58145e-40	Proliferating (MKI67+)	DTYMK
4.3952e-44	0.279692	0.476	0.056	8.27924e-40	Proliferating (MKI67+)	SPDL1
1.80111e-43	1.34947	1	0.511	3.39275e-39	Proliferating (MKI67+)	CKS1B
4.03298e-41	0.251313	0.365	0.035	7.59692e-37	Proliferating (MKI67+)	EZH2
1.54727e-40	0.277191	0.429	0.049	2.91459e-36	Proliferating (MKI67+)	SYNE2
4.76621e-40	1.1573	0.968	0.452	8.9781e-36	Proliferating (MKI67+)	TMEM106C
1.16557e-39	1.41376	1	0.994	2.19559e-35	Proliferating (MKI67+)	H2AFZ
2.36957e-39	0.640416	0.746	0.164	4.46355e-35	Proliferating (MKI67+)	CRNDE
1.28735e-38	1.10202	0.952	0.441	2.42498e-34	Proliferating (MKI67+)	UBE2S
1.08264e-37	1.88995	1	0.859	2.03936e-33	Proliferating (MKI67+)	TUBA1B
1.36923e-37	0.825823	0.794	0.222	2.57922e-33	Proliferating (MKI67+)	CDKN2D
1.84815e-37	1.61652	1	0.829	3.48137e-33	Proliferating (MKI67+)	TUBB
2.19741e-37	1.563	1	0.937	4.13925e-33	Proliferating (MKI67+)	STMN1
4.54139e-37	0.258037	0.444	0.057	8.55462e-33	Proliferating (MKI67+)	MIS18BP1
6.11796e-37	0.446261	0.46	0.064	1.15244e-32	Proliferating (MKI67+)	RMI2
4.66663e-36	1.16691	1	0.992	8.79054e-32	Proliferating (MKI67+)	HMGN2
6.29451e-36	0.47135	0.603	0.11	1.1857e-31	Proliferating (MKI67+)	DHFR
8.76793e-36	0.290515	0.429	0.055	1.65161e-31	Proliferating (MKI67+)	MGME1
3.32045e-35	0.534774	0.714	0.167	6.25472e-31	Proliferating (MKI67+)	TMPO
3.60947e-35	0.612321	0.762	0.198	6.79916e-31	Proliferating (MKI67+)	ANP32E
3.95395e-34	0.371312	0.556	0.098	7.44806e-30	Proliferating (MKI67+)	CKAP2
6.70139e-34	1.12272	1	0.954	1.26234e-29	Proliferating (MKI67+)	HMGB1
1.22013e-33	0.370071	0.54	0.095	2.29836e-29	Proliferating (MKI67+)	MIS18A
3.8913e-33	0.370965	0.54	0.095	7.33003e-29	Proliferating (MKI67+)	RFC2
8.5253e-33	0.328131	0.556	0.1	1.60591e-28	Proliferating (MKI67+)	RRM1
6.75948e-31	0.657909	0.81	0.267	1.27328e-26	Proliferating (MKI67+)	H2AFX
1.5924e-29	0.459118	0.508	0.095	2.9996e-25	Proliferating (MKI67+)	HIST2H2AC
4.60061e-29	0.773343	0.841	0.317	8.66617e-25	Proliferating (MKI67+)	GGH
6.60238e-29	0.283997	0.349	0.046	1.24369e-24	Proliferating (MKI67+)	CDCA4
5.27805e-28	0.80842	0.984	0.749	9.94225e-24	Proliferating (MKI67+)	H2AFV
6.43497e-28	0.830378	1	0.999	1.21215e-23	Proliferating (MKI67+)	PTMA
6.52057e-27	0.299266	0.444	0.078	1.22828e-22	Proliferating (MKI67+)	DBF4
5.99286e-26	0.264901	0.302	0.038	1.12888e-21	Proliferating (MKI67+)	CDT1
1.02041e-25	0.882222	0.952	0.543	1.92215e-21	Proliferating (MKI67+)	DEK
1.23963e-25	0.91113	0.794	0.319	2.33508e-21	Proliferating (MKI67+)	TUBB4B
1.27393e-25	1.03149	0.794	0.326	2.3997e-21	Proliferating (MKI67+)	KPNA2
1.77756e-25	0.268124	0.365	0.055	3.34839e-21	Proliferating (MKI67+)	PSRC1
4.65913e-25	0.284233	0.397	0.067	8.7764e-21	Proliferating (MKI67+)	LRR1
1.62823e-24	1.11695	0.952	0.683	3.0671e-20	Proliferating (MKI67+)	ARL6IP1
3.38688e-24	0.824508	0.905	0.574	6.37987e-20	Proliferating (MKI67+)	RPA3
3.85814e-24	0.676817	0.873	0.387	7.26758e-20	Proliferating (MKI67+)	LDHA
3.6978e-23	0.285154	0.365	0.062	6.96555e-19	Proliferating (MKI67+)	RCCD1
8.56841e-23	0.266054	0.508	0.114	1.61403e-18	Proliferating (MKI67+)	HAT1
8.96275e-23	0.554982	0.794	0.308	1.68831e-18	Proliferating (MKI67+)	ACYP1
9.24083e-23	0.834996	0.921	0.634	1.74069e-18	Proliferating (MKI67+)	DUT
1.75146e-22	0.644293	0.857	0.411	3.29923e-18	Proliferating (MKI67+)	BUB3
3.67596e-22	0.689799	1	0.835	6.92441e-18	Proliferating (MKI67+)	SNRPB
1.47098e-21	0.396448	0.587	0.164	2.77088e-17	Proliferating (MKI67+)	KIF22
3.04452e-21	0.520699	0.778	0.326	5.73496e-17	Proliferating (MKI67+)	SKA2
3.6111e-21	0.466975	0.651	0.215	6.80224e-17	Proliferating (MKI67+)	GMNN
4.58552e-21	0.313832	0.365	0.068	8.63774e-17	Proliferating (MKI67+)	RFC4
1.14164e-20	0.717987	0.968	0.794	2.15051e-16	Proliferating (MKI67+)	NUCKS1
1.14873e-20	0.613075	0.762	0.309	2.16386e-16	Proliferating (MKI67+)	TUBG1
1.95686e-20	0.253327	0.317	0.052	3.68613e-16	Proliferating (MKI67+)	FBXO5
4.09046e-20	0.40265	0.556	0.15	7.70521e-16	Proliferating (MKI67+)	MCM7
5.42699e-20	1.82472	0.857	0.652	1.02228e-15	Proliferating (MKI67+)	HIST1H4C
7.95277e-20	0.475879	0.825	0.348	1.49806e-15	Proliferating (MKI67+)	ITGB3BP
8.78307e-20	0.51813	0.683	0.253	1.65447e-15	Proliferating (MKI67+)	MZT1
9.60306e-20	0.341259	0.46	0.109	1.80893e-15	Proliferating (MKI67+)	HELLS
1.14546e-19	0.654913	0.984	0.778	2.15771e-15	Proliferating (MKI67+)	RANBP1
1.45478e-19	0.611454	0.968	0.638	2.74036e-15	Proliferating (MKI67+)	YWHAH
8.72484e-19	0.479791	0.778	0.321	1.6435e-14	Proliferating (MKI67+)	SAE1
1.46314e-18	0.337455	0.571	0.17	2.75611e-14	Proliferating (MKI67+)	HIRIP3
1.47989e-18	0.775912	0.984	0.735	2.78766e-14	Proliferating (MKI67+)	HN1
1.85813e-18	0.333444	0.54	0.157	3.50016e-14	Proliferating (MKI67+)	DCK
3.65471e-18	0.545509	1	0.903	6.88437e-14	Proliferating (MKI67+)	LSM4
3.68612e-18	0.58117	0.873	0.485	6.94354e-14	Proliferating (MKI67+)	CBX5
4.0444e-18	0.586445	0.873	0.545	7.61845e-14	Proliferating (MKI67+)	IFI27L1
4.30859e-18	0.397382	0.556	0.17	8.11609e-14	Proliferating (MKI67+)	DNAJC9
4.71167e-18	0.350769	0.683	0.242	8.87538e-14	Proliferating (MKI67+)	C19orf48
8.53566e-18	0.54164	0.952	0.7	1.60786e-13	Proliferating (MKI67+)	LSM3
1.53967e-17	0.538977	0.556	0.182	2.90027e-13	Proliferating (MKI67+)	PCNA
1.89213e-17	0.656175	0.905	0.7	3.5642e-13	Proliferating (MKI67+)	LSM5
3.5456e-17	0.602985	0.81	0.43	6.67885e-13	Proliferating (MKI67+)	TUBA1C
5.63e-17	0.547798	0.968	0.74	1.06052e-12	Proliferating (MKI67+)	H1FX
9.51372e-17	0.471437	0.651	0.251	1.7921e-12	Proliferating (MKI67+)	DNMT1
1.19652e-16	0.733992	0.921	0.567	2.25389e-12	Proliferating (MKI67+)	HMGB3
1.28384e-16	0.464162	0.698	0.318	2.41837e-12	Proliferating (MKI67+)	RNF26
2.9773e-16	0.494985	0.952	0.802	5.60833e-12	Proliferating (MKI67+)	ANP32B
3.21935e-16	0.347781	0.667	0.249	6.06429e-12	Proliferating (MKI67+)	WHSC1
4.05255e-16	0.566221	1	0.982	7.63379e-12	Proliferating (MKI67+)	HSP90AA1
5.34401e-16	0.459952	0.651	0.281	1.00665e-11	Proliferating (MKI67+)	EXOSC8
6.82548e-16	0.438804	0.841	0.438	1.28572e-11	Proliferating (MKI67+)	MAD2L2
7.1337e-16	0.499953	0.667	0.302	1.34378e-11	Proliferating (MKI67+)	DDX39A
8.9346e-16	0.477616	0.984	0.942	1.68301e-11	Proliferating (MKI67+)	SNRPG
1.17169e-15	0.413179	0.667	0.272	2.20711e-11	Proliferating (MKI67+)	YEATS4
1.6767e-15	0.383118	0.619	0.23	3.1584e-11	Proliferating (MKI67+)	SMC1A
2.59873e-15	0.408725	0.825	0.405	4.89523e-11	Proliferating (MKI67+)	CBX1
7.07763e-15	0.574768	0.952	0.773	1.33321e-10	Proliferating (MKI67+)	ZDHHC12
7.35693e-15	0.432556	1	0.998	1.38582e-10	Proliferating (MKI67+)	PPIA
9.5986e-15	0.468413	0.905	0.533	1.80809e-10	Proliferating (MKI67+)	PRADC1
1.27401e-14	0.599212	0.937	0.762	2.39984e-10	Proliferating (MKI67+)	STRA13
1.3373e-14	0.544388	0.889	0.67	2.51907e-10	Proliferating (MKI67+)	RAD21
1.76679e-14	0.401096	0.651	0.259	3.32811e-10	Proliferating (MKI67+)	TMEM97
2.9581e-14	0.253778	0.429	0.123	5.57218e-10	Proliferating (MKI67+)	TMEM19
3.85567e-14	0.450169	0.952	0.718	7.26292e-10	Proliferating (MKI67+)	HNRNPA3
5.18349e-14	0.464672	0.81	0.448	9.76415e-10	Proliferating (MKI67+)	PGP
5.48939e-14	0.590286	1	0.995	1.03404e-09	Proliferating (MKI67+)	CALM2
7.91806e-14	0.345308	0.444	0.136	1.49153e-09	Proliferating (MKI67+)	CDC25B
8.22964e-14	0.397335	1	0.954	1.55022e-09	Proliferating (MKI67+)	UQCC2
1.33251e-13	0.373401	0.635	0.269	2.51005e-09	Proliferating (MKI67+)	CKLF
1.53835e-13	0.285462	0.714	0.31	2.89779e-09	Proliferating (MKI67+)	SSRP1
2.28458e-13	0.286639	0.571	0.216	4.30345e-09	Proliferating (MKI67+)	LBR
2.36989e-13	0.461019	0.937	0.769	4.46416e-09	Proliferating (MKI67+)	H2AFY
3.94741e-13	0.290868	0.571	0.213	7.43573e-09	Proliferating (MKI67+)	RAD51C
6.18937e-13	0.438949	1	0.965	1.16589e-08	Proliferating (MKI67+)	PIN1
6.62764e-13	0.303234	0.397	0.117	1.24845e-08	Proliferating (MKI67+)	HIST1H1E
7.07286e-13	0.287416	0.619	0.241	1.33231e-08	Proliferating (MKI67+)	RANGAP1
7.31836e-13	0.489949	0.683	0.337	1.37856e-08	Proliferating (MKI67+)	REEP4
7.45574e-13	0.428296	0.984	0.763	1.40444e-08	Proliferating (MKI67+)	PAFAH1B3
8.30255e-13	0.543719	0.984	0.888	1.56395e-08	Proliferating (MKI67+)	HNRNPA2B1
9.82628e-13	0.480944	1	0.964	1.85098e-08	Proliferating (MKI67+)	RAN
1.1937e-12	0.556594	1	0.899	2.24858e-08	Proliferating (MKI67+)	C12orf75
1.20593e-12	0.456669	0.857	0.57	2.27161e-08	Proliferating (MKI67+)	EBP
1.26073e-12	0.505315	0.968	0.754	2.37484e-08	Proliferating (MKI67+)	HACD3
1.47578e-12	0.404568	0.778	0.415	2.77993e-08	Proliferating (MKI67+)	WDR34
2.07265e-12	0.370439	0.556	0.218	3.90425e-08	Proliferating (MKI67+)	USP1
2.21688e-12	0.397111	0.794	0.426	4.17593e-08	Proliferating (MKI67+)	CMC2
2.27435e-12	0.373497	1	0.957	4.28419e-08	Proliferating (MKI67+)	MZT2A
2.57393e-12	0.437186	1	0.998	4.84851e-08	Proliferating (MKI67+)	H3F3B
2.74357e-12	0.355299	0.683	0.341	5.16807e-08	Proliferating (MKI67+)	BTG3
3.08868e-12	0.541308	0.841	0.619	5.81814e-08	Proliferating (MKI67+)	SNRNP25
3.15483e-12	0.441262	0.778	0.471	5.94275e-08	Proliferating (MKI67+)	COMMD4
3.36411e-12	0.358108	0.587	0.244	6.33697e-08	Proliferating (MKI67+)	PSIP1
3.63381e-12	0.291659	0.556	0.219	6.845e-08	Proliferating (MKI67+)	PPIH
3.98481e-12	0.468489	0.857	0.588	7.50619e-08	Proliferating (MKI67+)	FADS1
6.75666e-12	0.446451	1	0.999	1.27275e-07	Proliferating (MKI67+)	ACTB
1.05461e-11	0.42417	0.984	0.973	1.98657e-07	Proliferating (MKI67+)	HMGN1
1.06934e-11	0.428673	0.968	0.812	2.01431e-07	Proliferating (MKI67+)	TMEM160
1.1148e-11	0.410052	0.794	0.46	2.09994e-07	Proliferating (MKI67+)	HP1BP3
1.18039e-11	0.319999	0.984	0.989	2.2235e-07	Proliferating (MKI67+)	ANAPC11
1.21877e-11	0.351649	1	0.996	2.29581e-07	Proliferating (MKI67+)	MZT2B
1.23877e-11	0.276977	0.603	0.25	2.33347e-07	Proliferating (MKI67+)	RAD1
1.32483e-11	0.257237	0.492	0.178	2.49559e-07	Proliferating (MKI67+)	RHNO1
1.49113e-11	0.471732	0.984	0.878	2.80884e-07	Proliferating (MKI67+)	PTGES3
1.79002e-11	0.420489	0.968	0.792	3.37186e-07	Proliferating (MKI67+)	CARHSP1
1.79565e-11	0.413616	0.968	0.87	3.38246e-07	Proliferating (MKI67+)	BLOC1S1
2.06448e-11	0.483459	0.762	0.441	3.88887e-07	Proliferating (MKI67+)	SMC2
2.41467e-11	0.272291	0.635	0.282	4.54852e-07	Proliferating (MKI67+)	RP11-545E17.3
3.40547e-11	0.457991	0.968	0.786	6.41488e-07	Proliferating (MKI67+)	SRSF2
3.7996e-11	0.358122	1	0.962	7.1573e-07	Proliferating (MKI67+)	ERH
5.12847e-11	0.425014	0.968	0.744	9.6605e-07	Proliferating (MKI67+)	NCL
5.1307e-11	0.386297	0.825	0.528	9.66469e-07	Proliferating (MKI67+)	HNRNPR
7.37775e-11	0.44837	0.841	0.593	1.38975e-06	Proliferating (MKI67+)	PSMC3
8.298e-11	0.289649	0.444	0.165	1.56309e-06	Proliferating (MKI67+)	TEX30
1.66103e-10	0.391509	0.778	0.447	3.12888e-06	Proliferating (MKI67+)	NASP
1.72464e-10	0.487947	0.81	0.568	3.2487e-06	Proliferating (MKI67+)	ILF2
1.73386e-10	0.46671	0.921	0.704	3.26607e-06	Proliferating (MKI67+)	RBMX
1.86613e-10	0.414787	0.603	0.287	3.51522e-06	Proliferating (MKI67+)	HIST1H1C
2.55602e-10	0.396359	0.937	0.781	4.81478e-06	Proliferating (MKI67+)	RHEB
2.92173e-10	0.361046	0.762	0.45	5.50366e-06	Proliferating (MKI67+)	HNRNPAB
3.29097e-10	0.38783	0.984	0.9	6.1992e-06	Proliferating (MKI67+)	SNRPD1
3.5932e-10	0.355517	0.937	0.682	6.76851e-06	Proliferating (MKI67+)	LSM8
5.27556e-10	0.319262	0.667	0.34	9.93757e-06	Proliferating (MKI67+)	GUSB
1.02369e-09	0.411228	0.968	0.858	1.92833e-05	Proliferating (MKI67+)	SRSF3
1.05962e-09	0.358052	0.825	0.589	1.99601e-05	Proliferating (MKI67+)	PXMP2
1.1382e-09	0.258209	0.603	0.276	2.14402e-05	Proliferating (MKI67+)	SUZ12
1.16983e-09	0.340443	1	0.991	2.20362e-05	Proliferating (MKI67+)	SUMO2
1.19755e-09	0.458834	0.714	0.415	2.25583e-05	Proliferating (MKI67+)	SAC3D1
1.24603e-09	0.360144	1	0.946	2.34715e-05	Proliferating (MKI67+)	AP2S1
1.28791e-09	0.322137	0.762	0.449	2.42603e-05	Proliferating (MKI67+)	EMC9
1.48531e-09	0.302835	0.984	0.951	2.79789e-05	Proliferating (MKI67+)	C19orf43
1.70047e-09	0.344742	0.81	0.492	3.20317e-05	Proliferating (MKI67+)	GLO1
1.76637e-09	0.30832	1	0.996	3.32731e-05	Proliferating (MKI67+)	PFN1
1.82637e-09	0.463956	0.937	0.746	3.44032e-05	Proliferating (MKI67+)	KIF5B
1.88073e-09	0.301231	0.778	0.476	3.54274e-05	Proliferating (MKI67+)	HNRNPH3
1.98577e-09	0.297997	1	0.928	3.7406e-05	Proliferating (MKI67+)	SNRPE
2.04821e-09	0.433512	0.889	0.67	3.8582e-05	Proliferating (MKI67+)	CACYBP
2.08643e-09	0.393295	0.794	0.549	3.9302e-05	Proliferating (MKI67+)	GGCT
2.18123e-09	0.404959	0.921	0.753	4.10879e-05	Proliferating (MKI67+)	C3orf14
2.36704e-09	0.298239	1	0.999	4.4588e-05	Proliferating (MKI67+)	COX8A
2.4742e-09	0.361048	0.651	0.375	4.66066e-05	Proliferating (MKI67+)	SMC3
2.61203e-09	0.275919	1	0.999	4.92028e-05	Proliferating (MKI67+)	UBB
2.95083e-09	0.280108	0.73	0.394	5.55847e-05	Proliferating (MKI67+)	RBBP7
3.13637e-09	0.304792	0.714	0.381	5.90797e-05	Proliferating (MKI67+)	CYB5B
4.34003e-09	0.337858	0.968	0.878	8.17532e-05	Proliferating (MKI67+)	PGAM1
5.41171e-09	0.255156	0.635	0.324	0.00010194	Proliferating (MKI67+)	LMF2
5.56681e-09	0.459132	0.968	0.865	0.000104862	Proliferating (MKI67+)	SIVA1
6.48544e-09	0.280714	0.635	0.308	0.000122166	Proliferating (MKI67+)	CENPV
6.76003e-09	0.370116	0.921	0.702	0.000127339	Proliferating (MKI67+)	FDPS
6.80033e-09	0.359009	0.889	0.707	0.000128098	Proliferating (MKI67+)	VDAC3
8.89796e-09	0.283587	0.635	0.32	0.000167611	Proliferating (MKI67+)	RFC1
1.14016e-08	0.29404	0.587	0.31	0.000214771	Proliferating (MKI67+)	PHGDH
1.32666e-08	0.380476	0.905	0.618	0.000249903	Proliferating (MKI67+)	PEG10
1.38009e-08	0.325234	0.857	0.639	0.000259967	Proliferating (MKI67+)	RDX
1.41871e-08	0.373329	0.952	0.828	0.000267243	Proliferating (MKI67+)	MORF4L2
1.51049e-08	0.378636	0.857	0.612	0.000284531	Proliferating (MKI67+)	HES4
1.57893e-08	0.371637	1	0.993	0.000297422	Proliferating (MKI67+)	HNRNPA1
1.60226e-08	0.341663	0.968	0.924	0.000301817	Proliferating (MKI67+)	MRPL51
1.78178e-08	0.285266	1	0.984	0.000335634	Proliferating (MKI67+)	HMGN3
1.79617e-08	0.421229	0.905	0.786	0.000338344	Proliferating (MKI67+)	HNRNPA0
2.13968e-08	0.30964	1	0.92	0.000403052	Proliferating (MKI67+)	MORF4L1
2.21534e-08	0.297024	0.81	0.54	0.000417304	Proliferating (MKI67+)	SMS
3.10316e-08	0.353392	0.921	0.627	0.000584542	Proliferating (MKI67+)	IMMP1L
4.03985e-08	0.323015	1	0.967	0.000760986	Proliferating (MKI67+)	YBX1
4.13816e-08	0.277493	0.73	0.456	0.000779504	Proliferating (MKI67+)	HNRNPM
6.07255e-08	0.329028	0.841	0.616	0.00114389	Proliferating (MKI67+)	UCP2
6.6088e-08	0.391649	0.794	0.595	0.0012449	Proliferating (MKI67+)	PA2G4
8.85304e-08	0.36063	0.778	0.507	0.00166765	Proliferating (MKI67+)	NUDCD2
9.01472e-08	0.290543	0.714	0.465	0.0016981	Proliferating (MKI67+)	PIGX
1.0353e-07	0.426422	0.635	0.391	0.00195019	Proliferating (MKI67+)	TUBB2A
1.18554e-07	0.520129	1	0.979	0.00223319	Proliferating (MKI67+)	TMSB4X
2.24379e-07	0.348912	0.921	0.757	0.00422663	Proliferating (MKI67+)	CD320
2.42826e-07	0.254246	0.762	0.466	0.00457411	Proliferating (MKI67+)	NNT-AS1
2.48978e-07	0.284908	0.524	0.26	0.00468999	Proliferating (MKI67+)	FRMD4B
2.60606e-07	0.290681	0.841	0.62	0.00490904	Proliferating (MKI67+)	PMF1
2.98641e-07	0.336254	0.984	0.971	0.00562549	Proliferating (MKI67+)	CHCHD2
2.99794e-07	0.264236	0.794	0.573	0.00564723	Proliferating (MKI67+)	KHDRBS1
3.02729e-07	0.357299	0.889	0.764	0.0057025	Proliferating (MKI67+)	HMGA1
3.05394e-07	0.3033	0.667	0.43	0.0057527	Proliferating (MKI67+)	UFD1L
3.7055e-07	0.336174	0.825	0.62	0.00698005	Proliferating (MKI67+)	RALY
4.55155e-07	0.282995	0.73	0.485	0.00857375	Proliferating (MKI67+)	HNRNPD
4.75418e-07	0.329988	0.794	0.598	0.00895545	Proliferating (MKI67+)	SFPQ
5.32615e-07	0.333192	0.905	0.738	0.0100329	Proliferating (MKI67+)	FUS
5.6856e-07	0.27091	0.889	0.719	0.01071	Proliferating (MKI67+)	RBM8A
6.44395e-07	0.291004	0.937	0.888	0.0121385	Proliferating (MKI67+)	DCTN3
6.82192e-07	0.366466	0.825	0.62	0.0128505	Proliferating (MKI67+)	SRSF10
7.4368e-07	0.296206	0.873	0.694	0.0140087	Proliferating (MKI67+)	EIF4EBP1
7.66188e-07	0.257598	0.651	0.395	0.0144327	Proliferating (MKI67+)	FGD5-AS1
1.06528e-06	0.27665	0.905	0.702	0.0200667	Proliferating (MKI67+)	CNIH4
1.231e-06	0.271949	0.857	0.668	0.0231883	Proliferating (MKI67+)	ISCA2
1.32449e-06	0.380987	0.921	0.857	0.0249495	Proliferating (MKI67+)	TECR
1.50597e-06	0.253494	0.556	0.315	0.028368	Proliferating (MKI67+)	ASRGL1
1.57661e-06	0.338783	0.81	0.643	0.0296987	Proliferating (MKI67+)	POLD2
1.73045e-06	0.373366	0.857	0.702	0.0325964	Proliferating (MKI67+)	NUCB2
2.08344e-06	0.259457	0.492	0.251	0.0392457	Proliferating (MKI67+)	MTHFD2
2.93068e-06	0.263752	0.905	0.652	0.0552053	Proliferating (MKI67+)	NABP2
3.64948e-06	0.303507	0.825	0.589	0.0687453	Proliferating (MKI67+)	KPNB1
4.19581e-06	0.284676	0.857	0.608	0.0790364	Proliferating (MKI67+)	FABP5
4.97565e-06	0.271143	1	0.934	0.0937263	Proliferating (MKI67+)	ARL2
5.40638e-06	0.261177	0.492	0.269	0.10184	Proliferating (MKI67+)	MTUS1
5.66388e-06	0.279461	0.651	0.406	0.106691	Proliferating (MKI67+)	PNRC2
6.07873e-06	0.251909	0.873	0.683	0.114505	Proliferating (MKI67+)	MAPRE1
6.22034e-06	0.304436	0.746	0.564	0.117172	Proliferating (MKI67+)	C22orf39
6.43938e-06	0.32248	0.603	0.378	0.121299	Proliferating (MKI67+)	RUVBL2
7.14834e-06	0.288161	0.889	0.761	0.134653	Proliferating (MKI67+)	PSMA4
7.40732e-06	0.320782	0.873	0.721	0.139532	Proliferating (MKI67+)	HSPB11
7.56979e-06	0.265027	1	0.988	0.142592	Proliferating (MKI67+)	TPI1
8.39071e-06	0.29993	0.54	0.323	0.158056	Proliferating (MKI67+)	RP11-620J15.3
8.75712e-06	0.260217	0.984	0.835	0.164958	Proliferating (MKI67+)	PLP2
1.00578e-05	0.295282	0.952	0.869	0.18946	Proliferating (MKI67+)	SNRPF
1.0748e-05	0.299568	1	0.998	0.20246	Proliferating (MKI67+)	TMSB10
1.10972e-05	0.309623	0.81	0.676	0.209038	Proliferating (MKI67+)	CDK4
1.30724e-05	0.281643	0.889	0.66	0.246244	Proliferating (MKI67+)	TUBA4A
1.43419e-05	0.26457	0.873	0.667	0.270158	Proliferating (MKI67+)	GSTO1
1.48685e-05	0.276458	0.794	0.652	0.280077	Proliferating (MKI67+)	TMEM60
1.4893e-05	0.275388	0.857	0.708	0.280539	Proliferating (MKI67+)	TALDO1
1.89477e-05	0.250047	0.857	0.684	0.356918	Proliferating (MKI67+)	IDH2
2.11184e-05	0.260481	0.81	0.571	0.397807	Proliferating (MKI67+)	NFU1
2.11734e-05	0.264958	0.857	0.698	0.398843	Proliferating (MKI67+)	COPS6
3.18786e-05	0.307238	0.952	0.878	0.600497	Proliferating (MKI67+)	HSP90B1
3.35156e-05	0.355464	0.651	0.442	0.631334	Proliferating (MKI67+)	TUBB2B
3.70771e-05	0.289299	0.857	0.789	0.698422	Proliferating (MKI67+)	HSPD1
3.99264e-05	0.251136	0.413	0.237	0.752094	Proliferating (MKI67+)	HAUS1
4.11677e-05	0.251039	0.46	0.252	0.775475	Proliferating (MKI67+)	CDKN1A
4.47045e-05	0.264569	0.714	0.526	0.842098	Proliferating (MKI67+)	PSMG2
4.77341e-05	0.273867	1	0.972	0.899168	Proliferating (MKI67+)	C12orf57
5.72056e-05	0.263855	0.905	0.829	1	Proliferating (MKI67+)	LSM2
6.40052e-05	0.250803	0.476	0.283	1	Proliferating (MKI67+)	SLBP
6.75675e-05	0.305159	0.984	0.94	1	Proliferating (MKI67+)	CYCS
8.34501e-05	0.254871	0.889	0.821	1	Proliferating (MKI67+)	SET
9.10374e-05	0.276394	0.905	0.797	1	Proliferating (MKI67+)	TMEM54
0.000148124	0.344835	0.937	0.914	1	Proliferating (MKI67+)	PKM
0.000165103	0.253945	0.794	0.625	1	Proliferating (MKI67+)	TMUB1
0.000176203	0.36844	0.889	0.795	1	Proliferating (MKI67+)	TUBA1A
0.000224759	0.252773	0.937	0.841	1	Proliferating (MKI67+)	YWHAQ
0.000289894	0.344125	1	0.921	1	Proliferating (MKI67+)	CPE
0.000338952	0.350938	0.778	0.583	1	Proliferating (MKI67+)	IER2
0.00036497	0.2604	0.619	0.44	1	Proliferating (MKI67+)	MAZ
0.000411739	0.390276	0.825	0.751	1	Proliferating (MKI67+)	CKB
0.000510353	0.282682	0.762	0.645	1	Proliferating (MKI67+)	SEPT7
0.00100178	0.291501	0.857	0.747	1	Proliferating (MKI67+)	DNAJB1
0.00474867	0.379788	0.413	0.273	1	Proliferating (MKI67+)	GC
0.00639292	0.254553	0.857	0.811	1	Proliferating (MKI67+)	ATP5B
0.00878637	0.351396	0.492	0.342	1	Proliferating (MKI67+)	VIM
0.00900235	0.251067	0.635	0.534	1	Proliferating (MKI67+)	PARP1
0.0224944	0.319434	0.635	0.534	1	Proliferating (MKI67+)	KLF6
